# Supplementary material for: Combined effects of the lewis acidity and electric field of proximal redox innocent metal ions on the redox potential of vanadyl Schiff base complexes: an experimental and theoretical study
Source: Royal Society of Chemistry journal article supplement (doi:10.1039/d3dt00024a), 2023-01-01
Supplement: d3dt00024a1.pdf [file d3dt00024a1.pdf]

## Combine Effect of Lewis Acidity and Electric Field of Proximal Redox Innocent Metal Ions on Redox Potential of Vanadyl Schiff Base Complexes: Experimental and Theoretical Study

Pradip Bhunia,<sup>†</sup> Rosa M. Gomila,<sup>§</sup> Antonio Frontera<sup>\*,§</sup> and Ashutosh Ghosh<sup>\*†,⊥</sup>

<sup>†</sup>*Department of Chemistry, University College of Science, University of Calcutta, 92, A.P.C. Road, Kolkata-700 009, India, \*E-mail: ghosh\_59@yahoo.com*

<sup>§</sup>*Departament de Química, Universitat de les Illes Balears, Crta. de Valldemossa km 7.5, 07122 Palma de Mallorca (Balears), SPAIN, E-mail: toni.frontera@uib.es*

<sup>⊥</sup>*Rani Rashmoni Green University, Tarakeswar, Hooghly 712410, West Bengal, India*

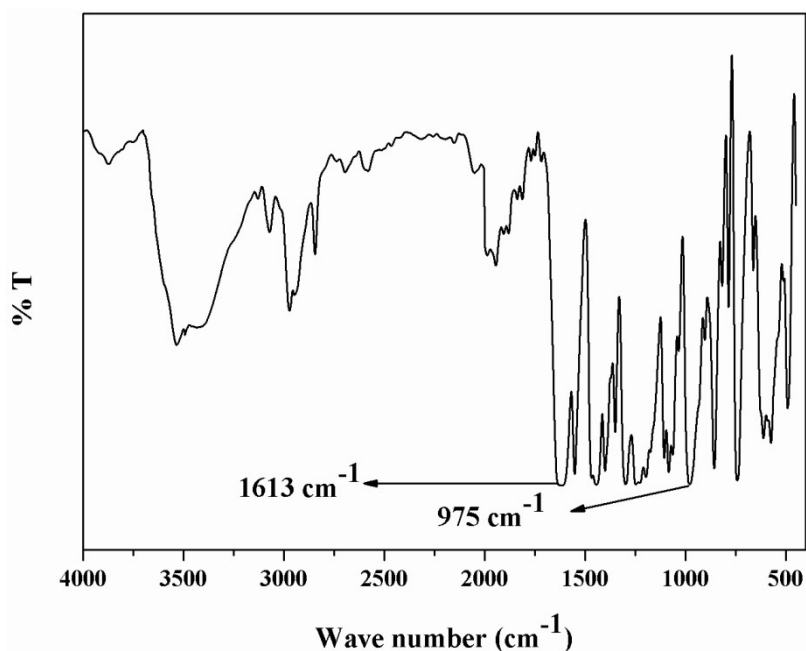

**Fig. S1.** IR spectrum of complex 1

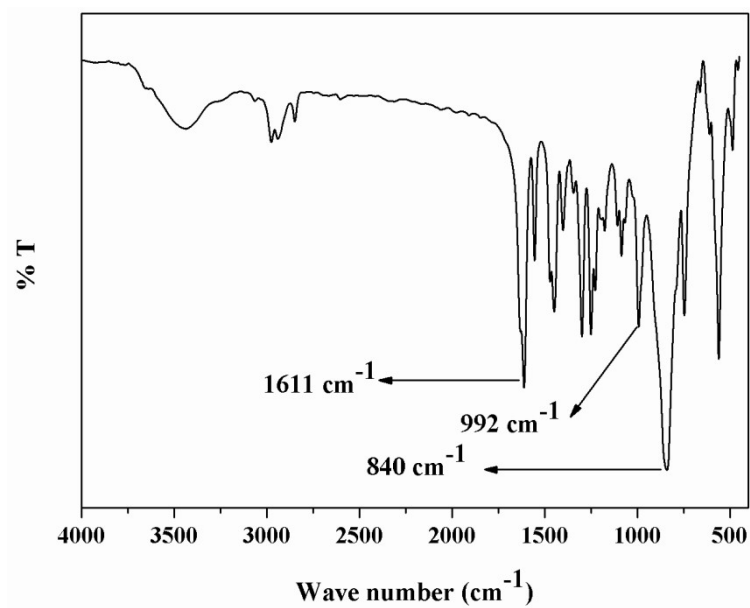

**Fig. S2.** IR spectrum of complex 1•K

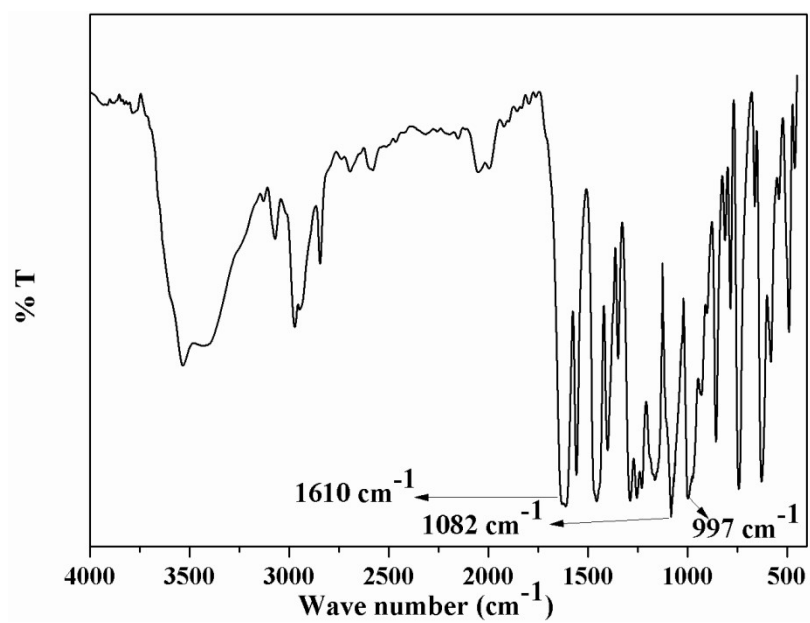

**Fig. S3.** IR spectrum of complex 1•Ba

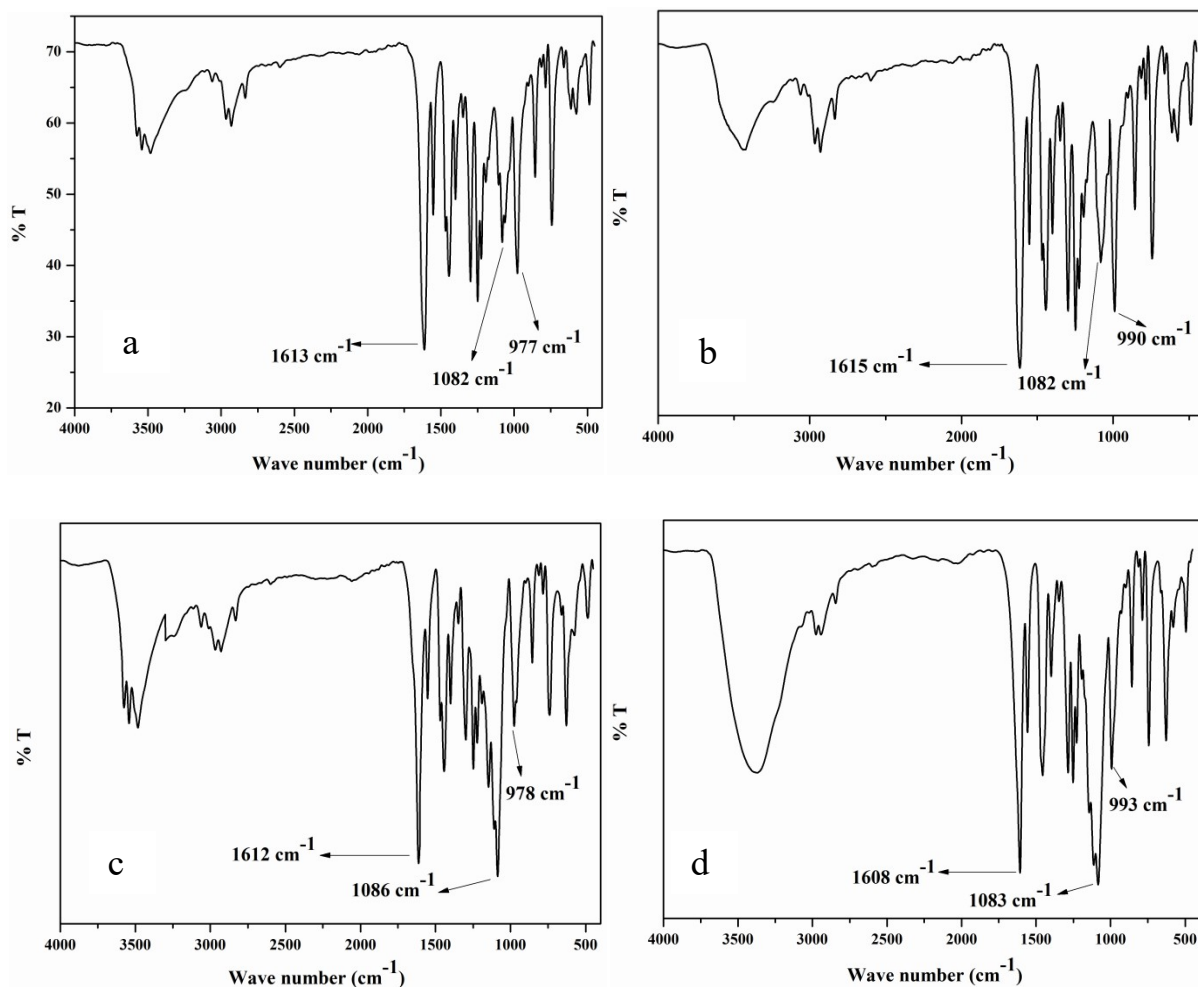

**Fig. S4.** IR spectra of the compounds (a) **1•Li**, (b) **1•Na**, (c) **1•Mg** and (d) **1•Ca**

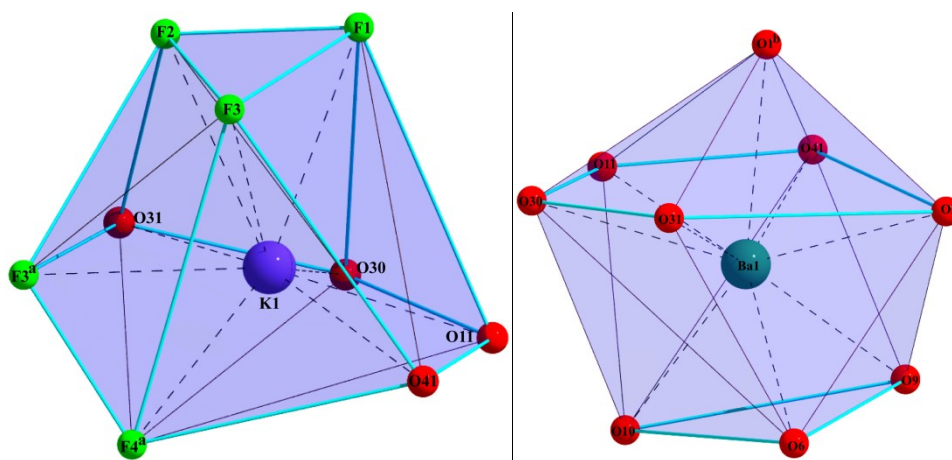

**Fig. S5.** Polyhedral view of the coordination sphere around the potassium and barium centres for complexes **1•K** (left) and **1•Ba** (right), respectively.

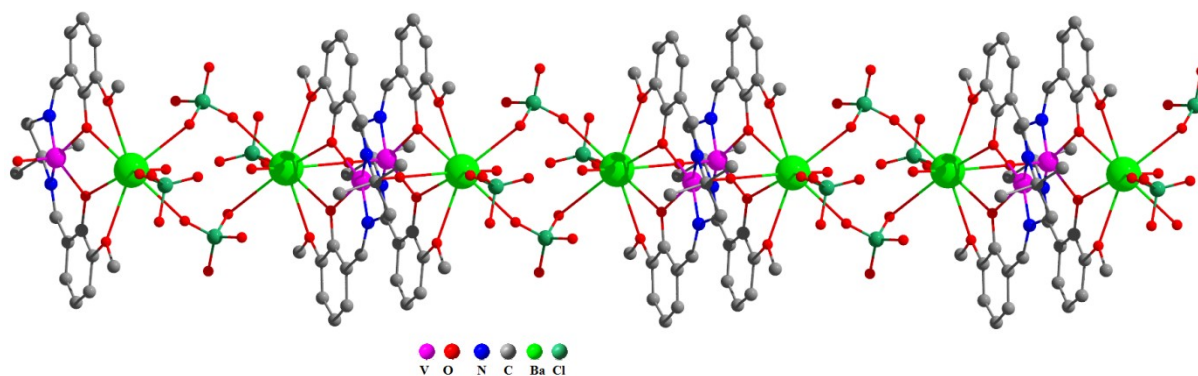

**Fig. S6.** Polymeric chain of complex **1•Ba**.

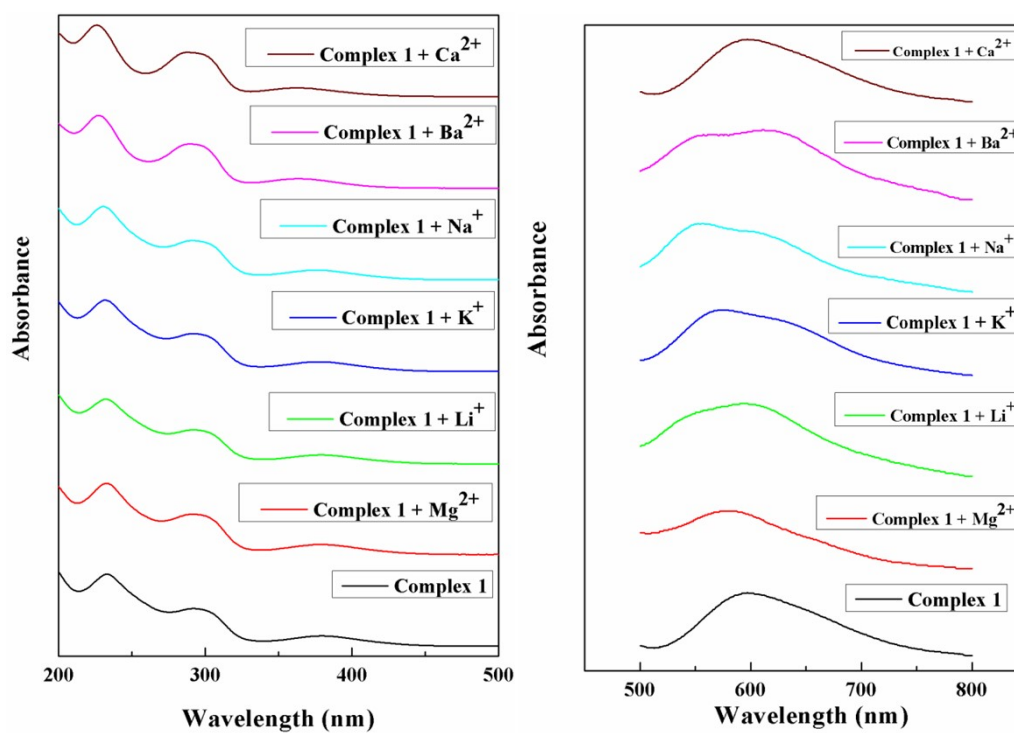

**Fig. S7.** CT [ $5 \times 10^{-5}$  M] (left) and d-d [ $1 \times 10^{-3}$  M] (right) spectra of complex **1** and complex **1•M** [ $\text{M} = \text{Mg}^{2+}$ ,  $\text{Li}^{+}$ ,  $\text{K}^{+}$ ,  $\text{Na}^{+}$ ,  $\text{Ba}^{2+}$  and  $\text{Ca}^{2+}$ ] in acetonitrile solution.

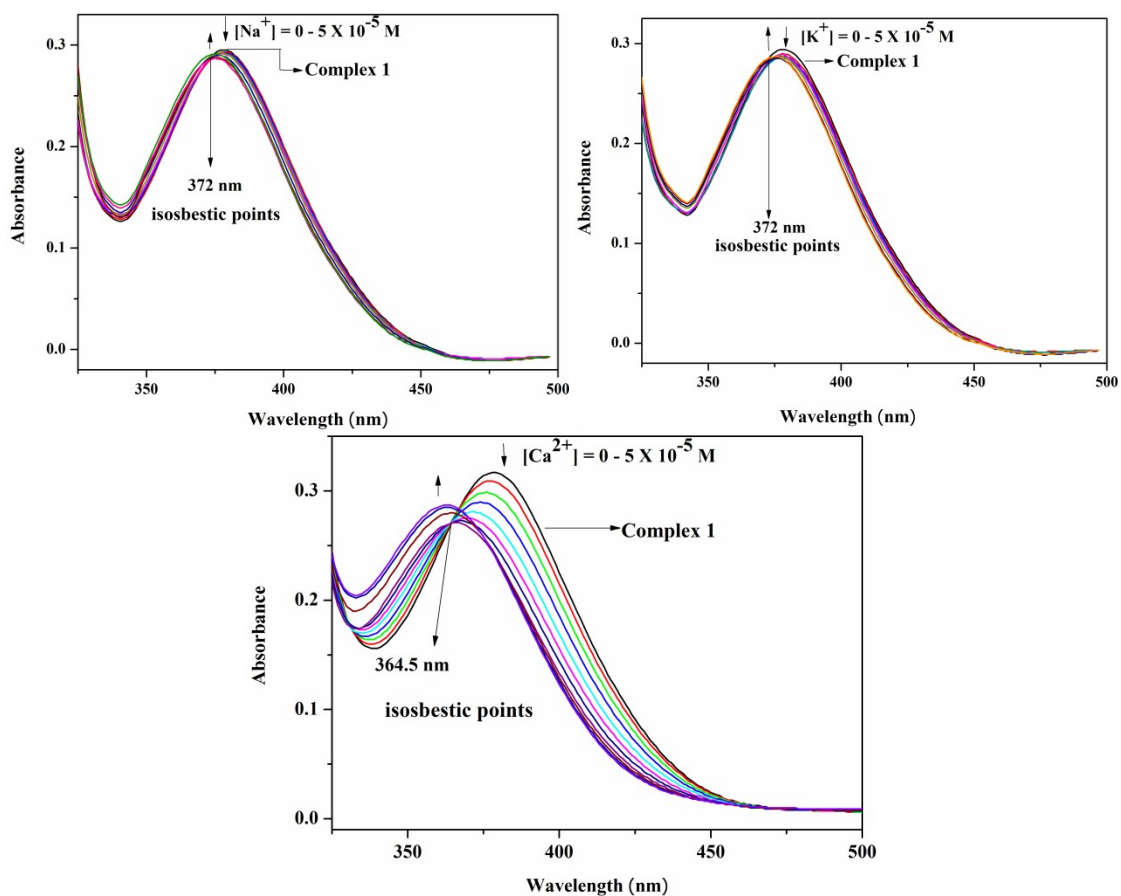

**Fig. S8.** Spectrophotometric titration of the fixed  $5 \times 10^{-5}$  M concentration of the complex **1** by  $5 \times 10^{-3}$  M respective metal ions in acetonitrile. The range of concentration for metal ions in the figure, indicates its final concentration in solution.

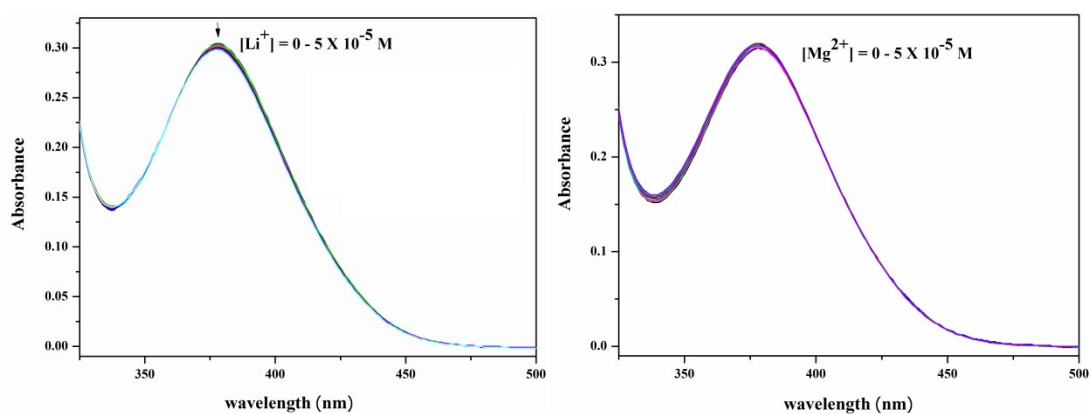

**Fig. S9.** Spectrophotometric titration of the fixed  $5 \times 10^{-5}$  M concentration of the complex **1** by  $5 \times 10^{-3}$  M respective metal ions in acetonitrile. The range of concentration for metal ions in the figure, indicates its final concentration in solution.

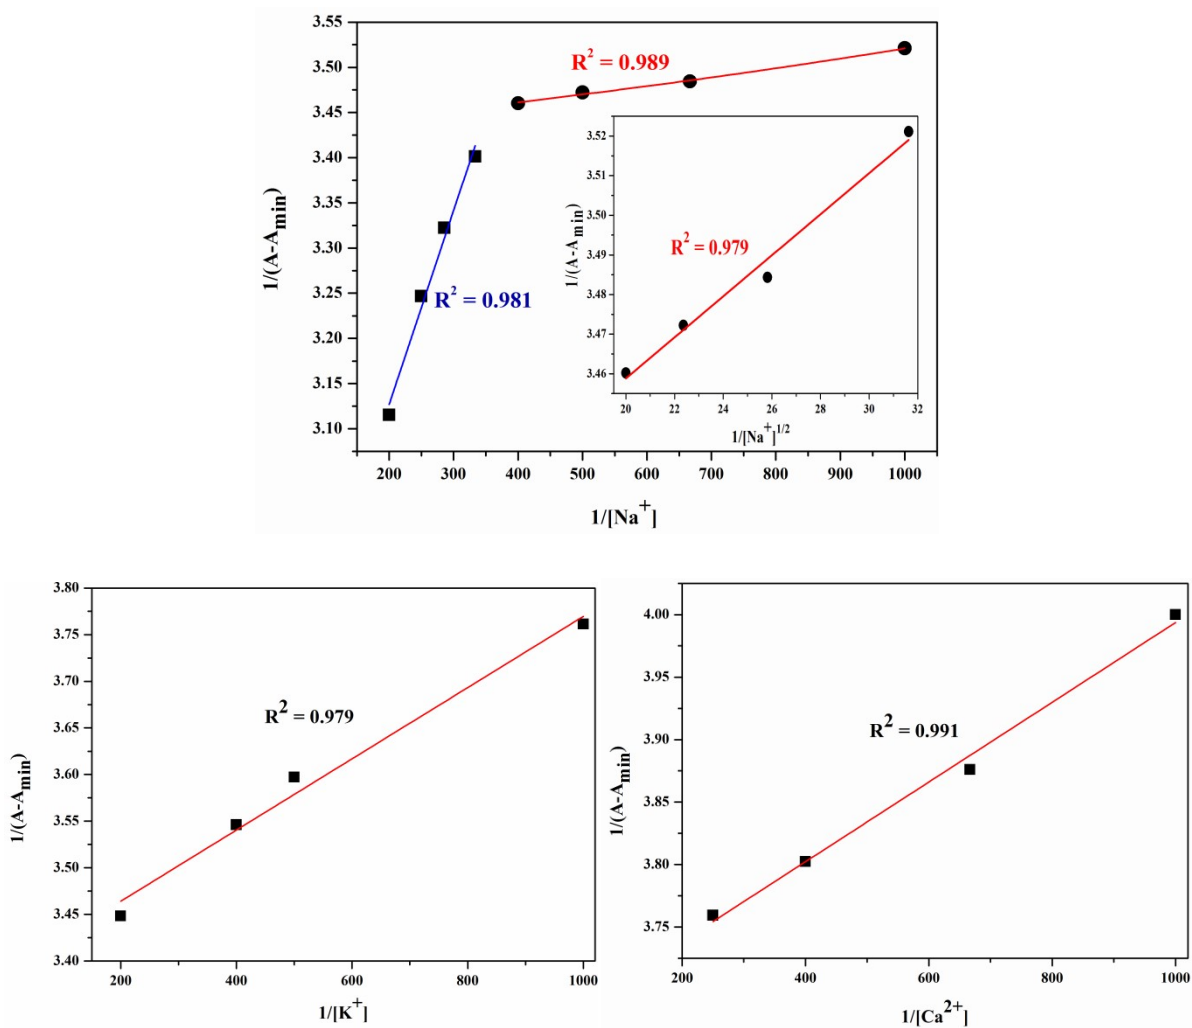

**Fig. S10.** Benesi–Hildebrand plot for the associative interaction of complex **1** with  $\text{Na}^+$  (upper panel),  $\text{K}^+$  (upper panel, left) and  $\text{Ca}^{2+}$  (lower panel, right) in acetonitrile.

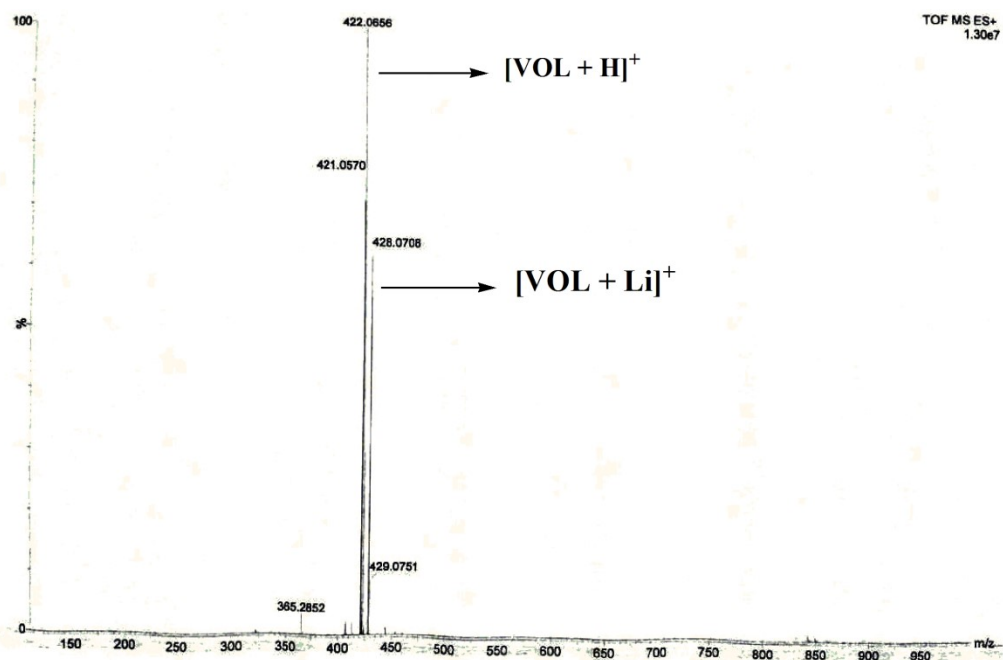

Fig. S11. Representative ESI mass spectrum of complex **1** and LiClO<sub>4</sub> mixture in acetonitrile.

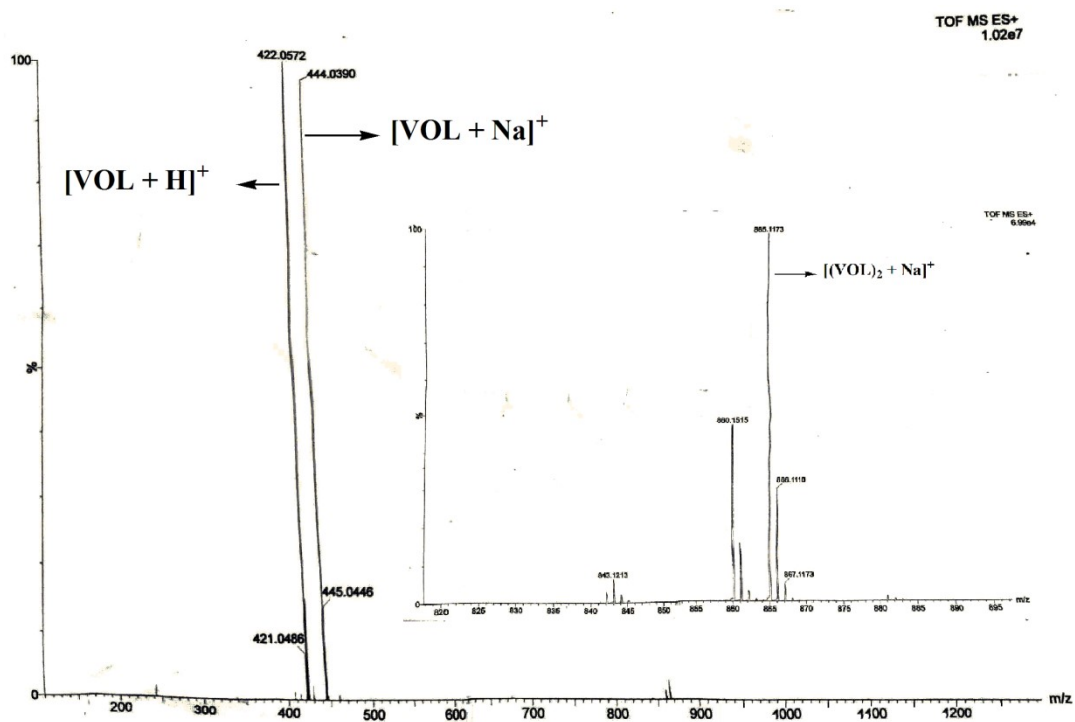

Fig. S12. Representative ESI mass spectrum of complex **1** and NaBF<sub>4</sub> mixture in acetonitrile.

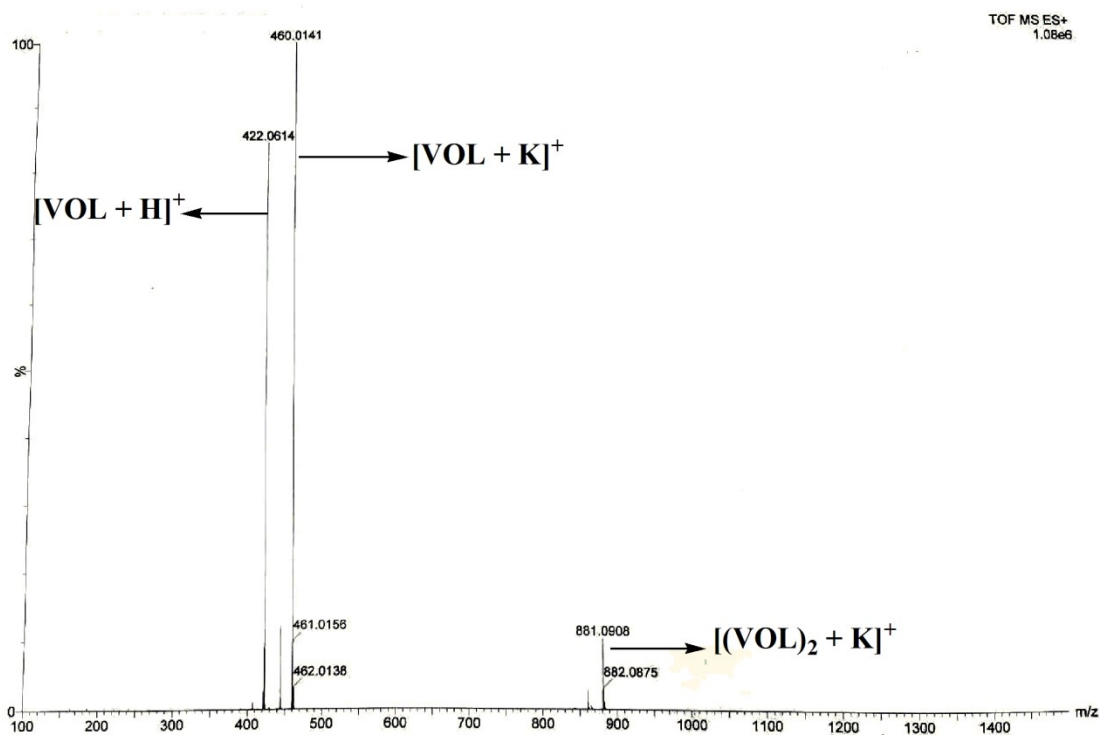

Fig. S13. Representative ESI mass spectrum of complex **1** and KPF<sub>6</sub> mixture in acetonitrile.

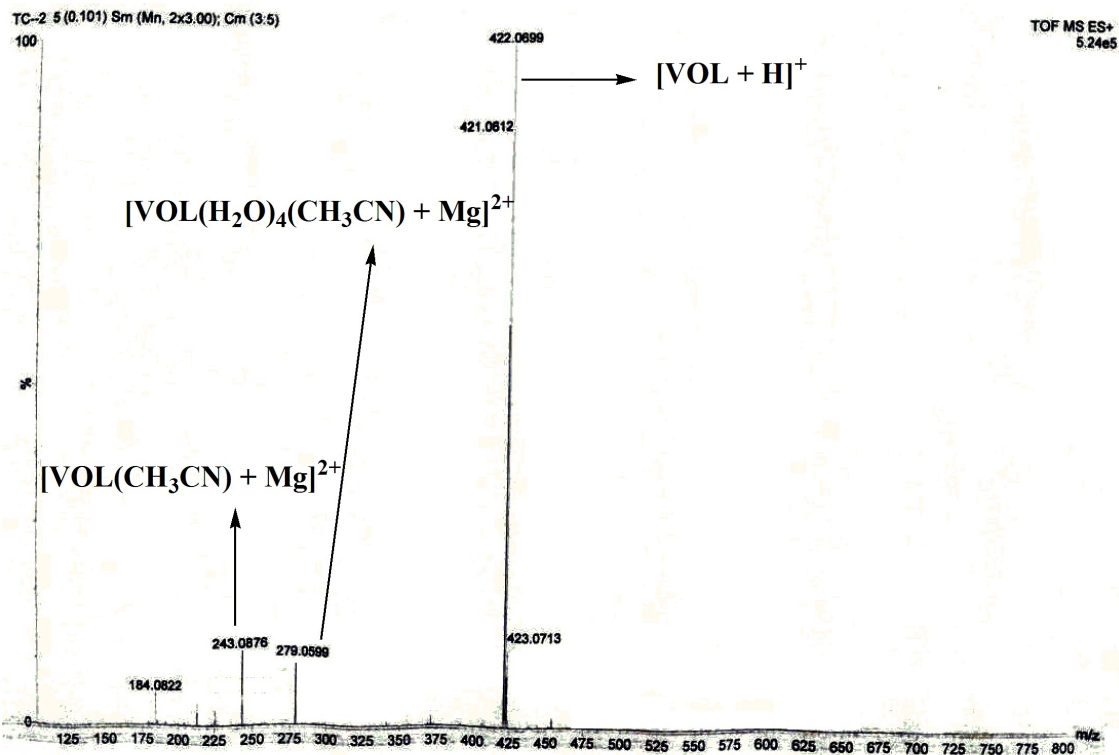

Fig. S14. Representative ESI mass spectrum of complex **1** and Mg(ClO<sub>4</sub>)<sub>2</sub> mixture in acetonitrile.



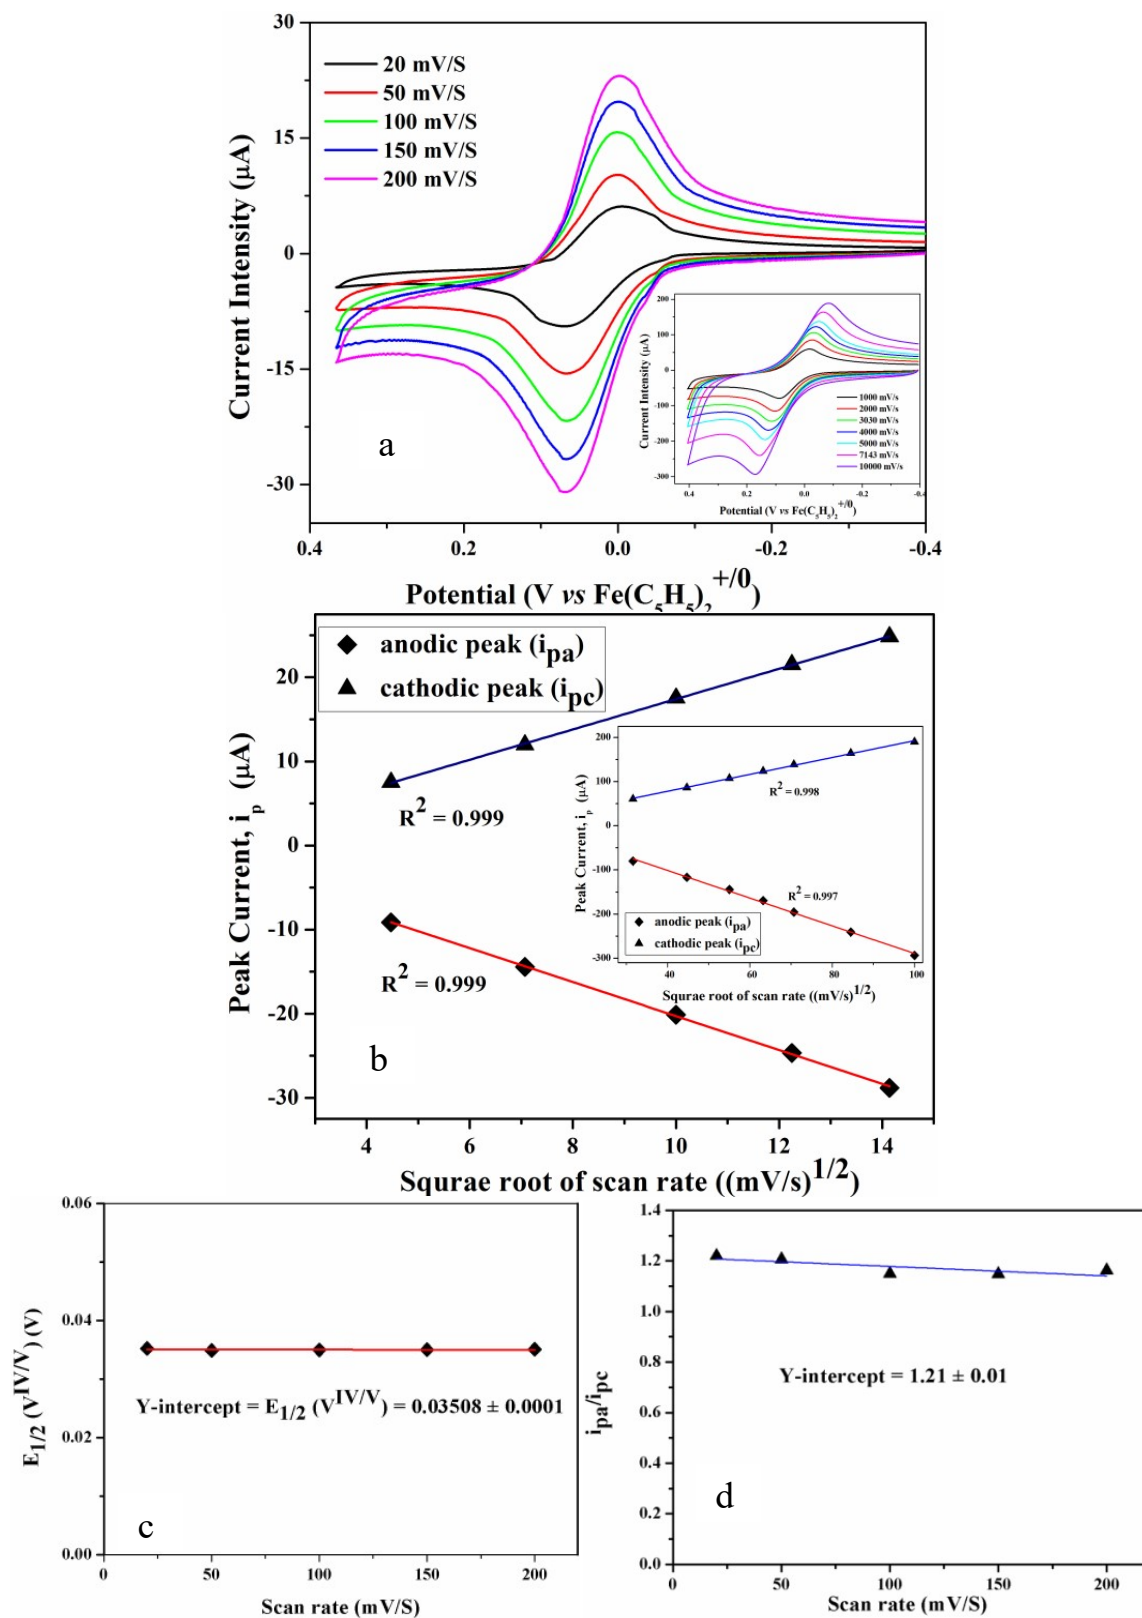

**Fig. S15.** Cyclic voltammograms data of complex **1** ( $10^{-3}$  M) in presence of 0.1 M TBAP in acetonitrile (insert: at high scan rate). (a) scan rate dependence data for complex **1**. (b) plot of peak current density vs.  $(\text{scan rate})^{1/2}$ . (c) plot of  $E_{1/2}$  value vs. scan rate. (d) plot of ratio of anodic to cathodic peak currents vs. scan rate.

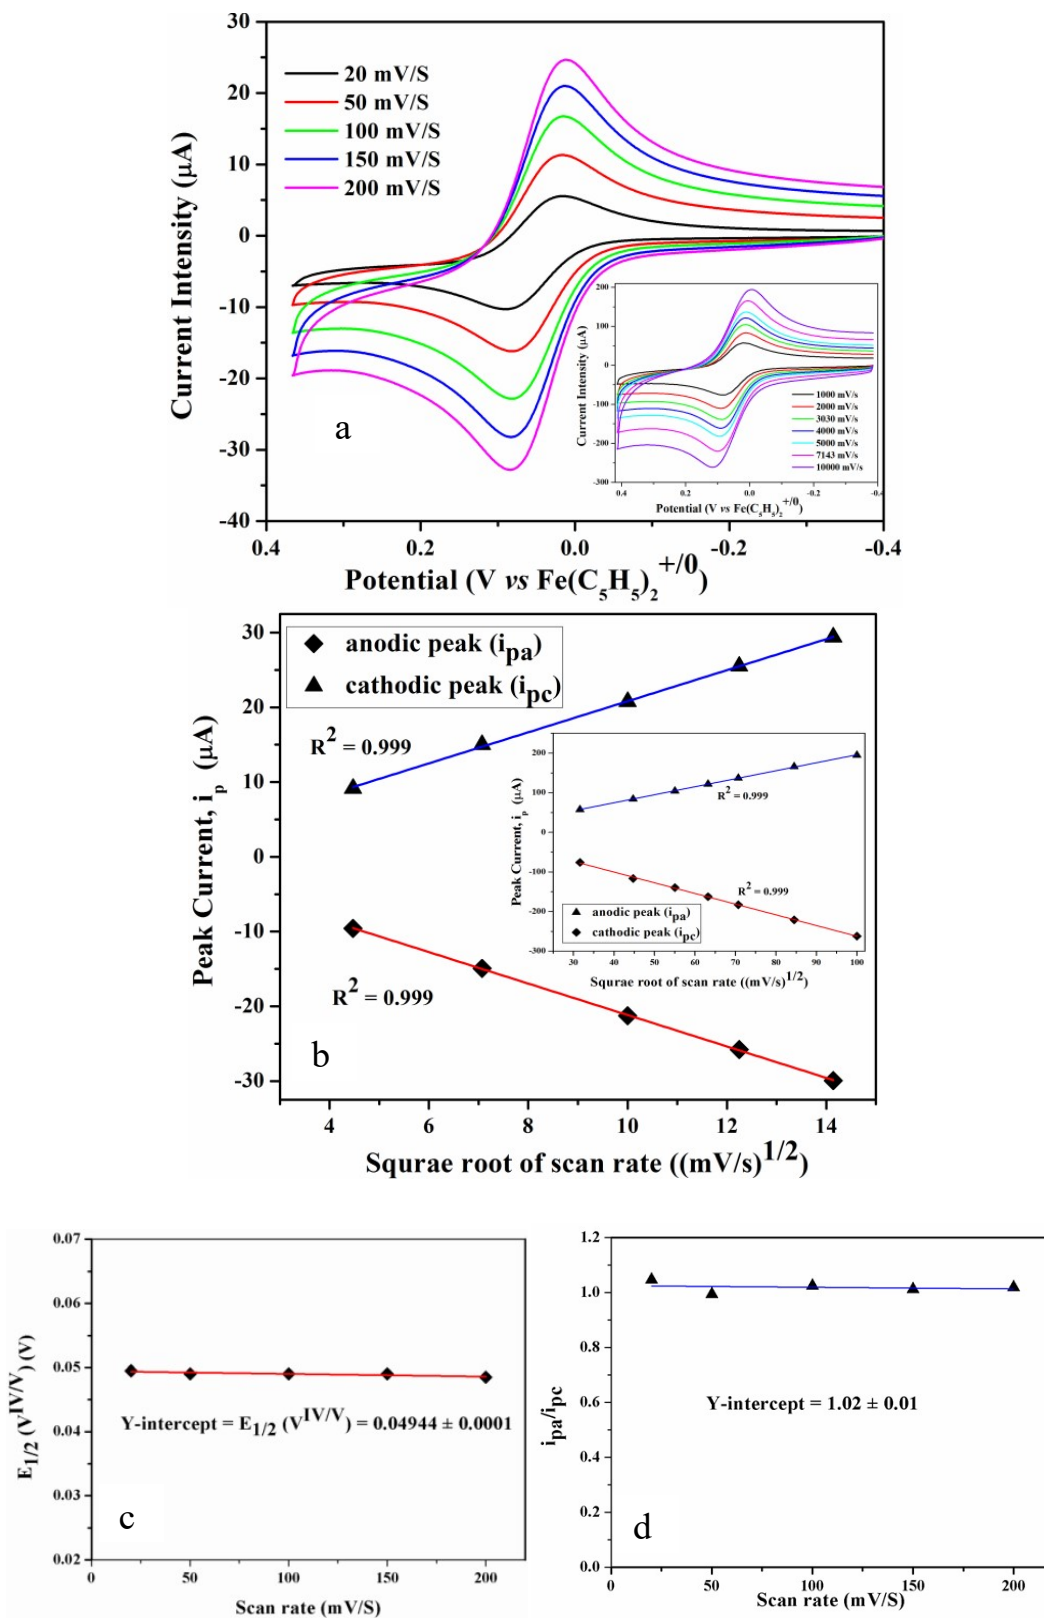

**Fig. S16.** Cyclic voltammograms data of complex **1** +  $\text{Li}^+$  ( $10^{-3}$  M) in presence of 0.1 M TBAP in acetonitrile (insert: at high scan rate). (a) scan rate dependence data for complex **1** +  $\text{Li}^+$ . (b) plot of peak current density vs. (scan rate) $^{1/2}$ . (c) plot of  $E_{1/2}$  value vs. scan rate. (d) plot of ratio of anodic to cathodic peak currents vs. scan rate.

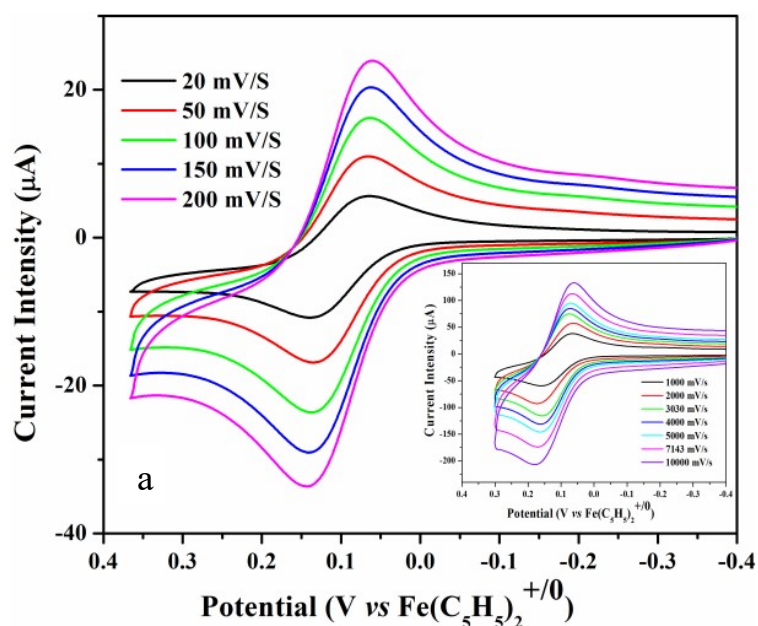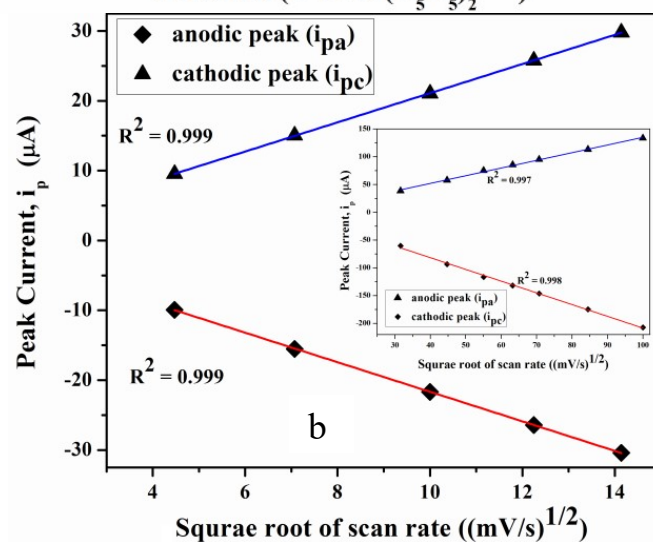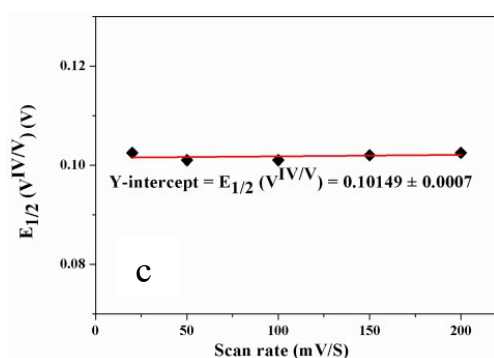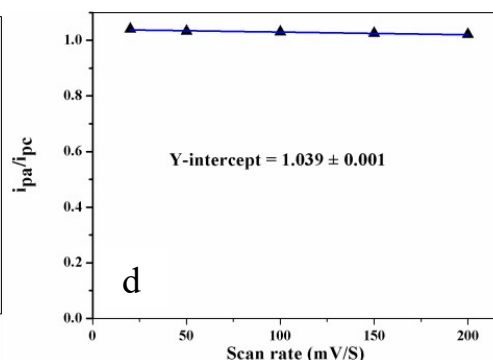

**Fig. S17.** Cyclic voltammograms data of complex **1**+ Na<sup>+</sup> (10<sup>-3</sup> M) in presence of 0.1 M TBAP in acetonitrile (insert: at high scan rate). (a) scan rate dependence data for complex **1** + Na<sup>+</sup>. (b) plot of peak current density vs. (scan rate)<sup>1/2</sup>. (c) plot of E<sub>1/2</sub> value vs. scan rate. (d) plot of ratio of anodic to cathodic peak currents vs. scan rate.

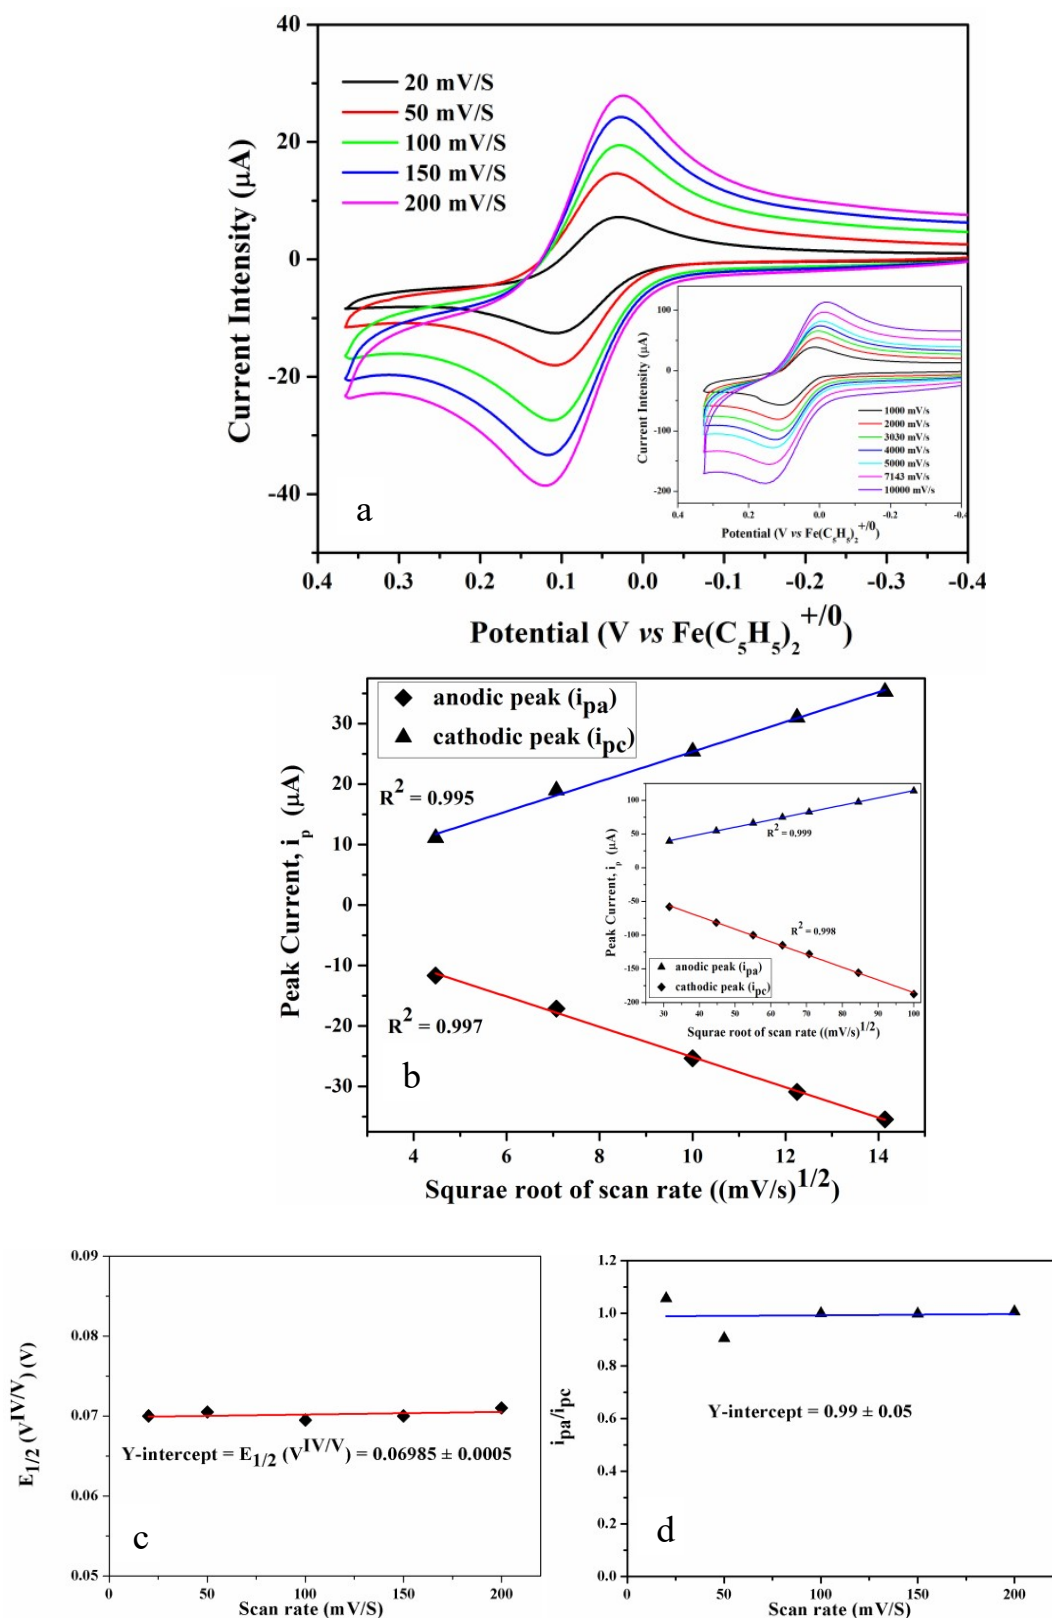

**Fig. S18.** Cyclic voltammograms data of complex 1 + K<sup>+</sup> (10<sup>-3</sup> M) in presence of 0.1 M TBAP in acetonitrile (insert: at high scan rate). (a) scan rate dependence data for complex 1 + K<sup>+</sup>. (b) plot of peak current density vs. (scan rate)<sup>1/2</sup>. (c) plot of  $E_{1/2}$  value vs. scan rate. (d) plot of ratio of anodic to cathodic peak currents vs. scan rate.

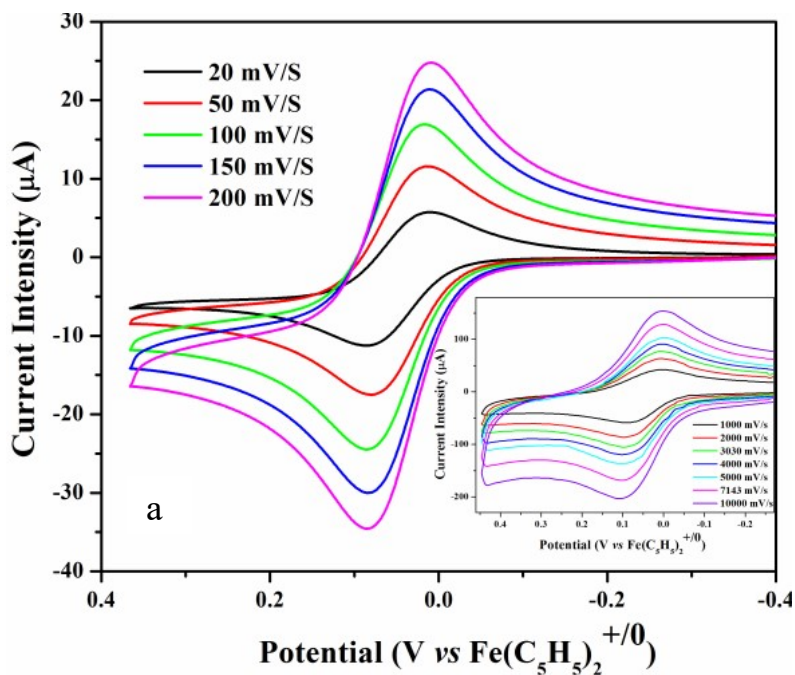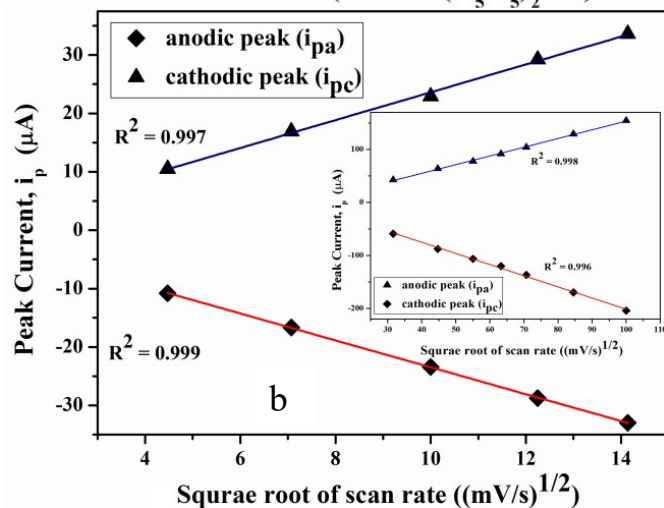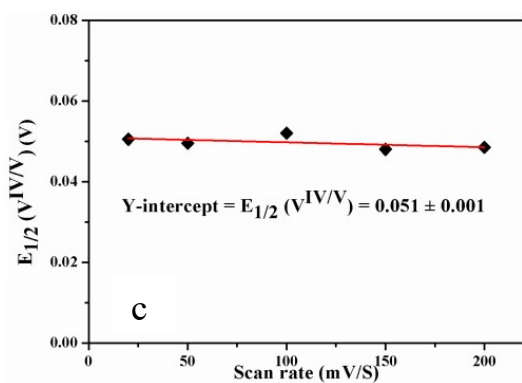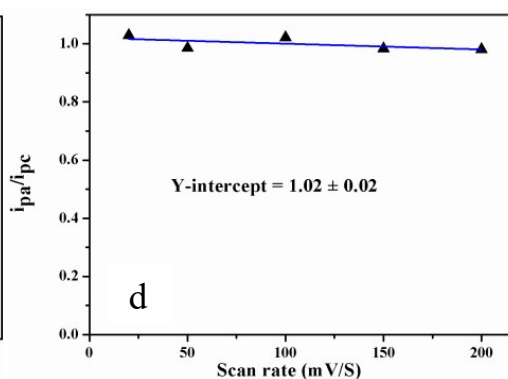

**Fig. S19.** Cyclic voltammograms data of complex 1 + Mg<sup>2+</sup> (10<sup>-3</sup> M) in presence of 0.1 M TBAP in acetonitrile (insert: at high scan rate). (a) scan rate dependence data for complex 1 + Mg<sup>2+</sup>. (b) plot of peak current density vs. (scan rate)<sup>1/2</sup>. (c) plot of  $E_{1/2}$  value vs. scan rate. (d) plot of ratio of anodic to cathodic peak currents vs. scan rate.

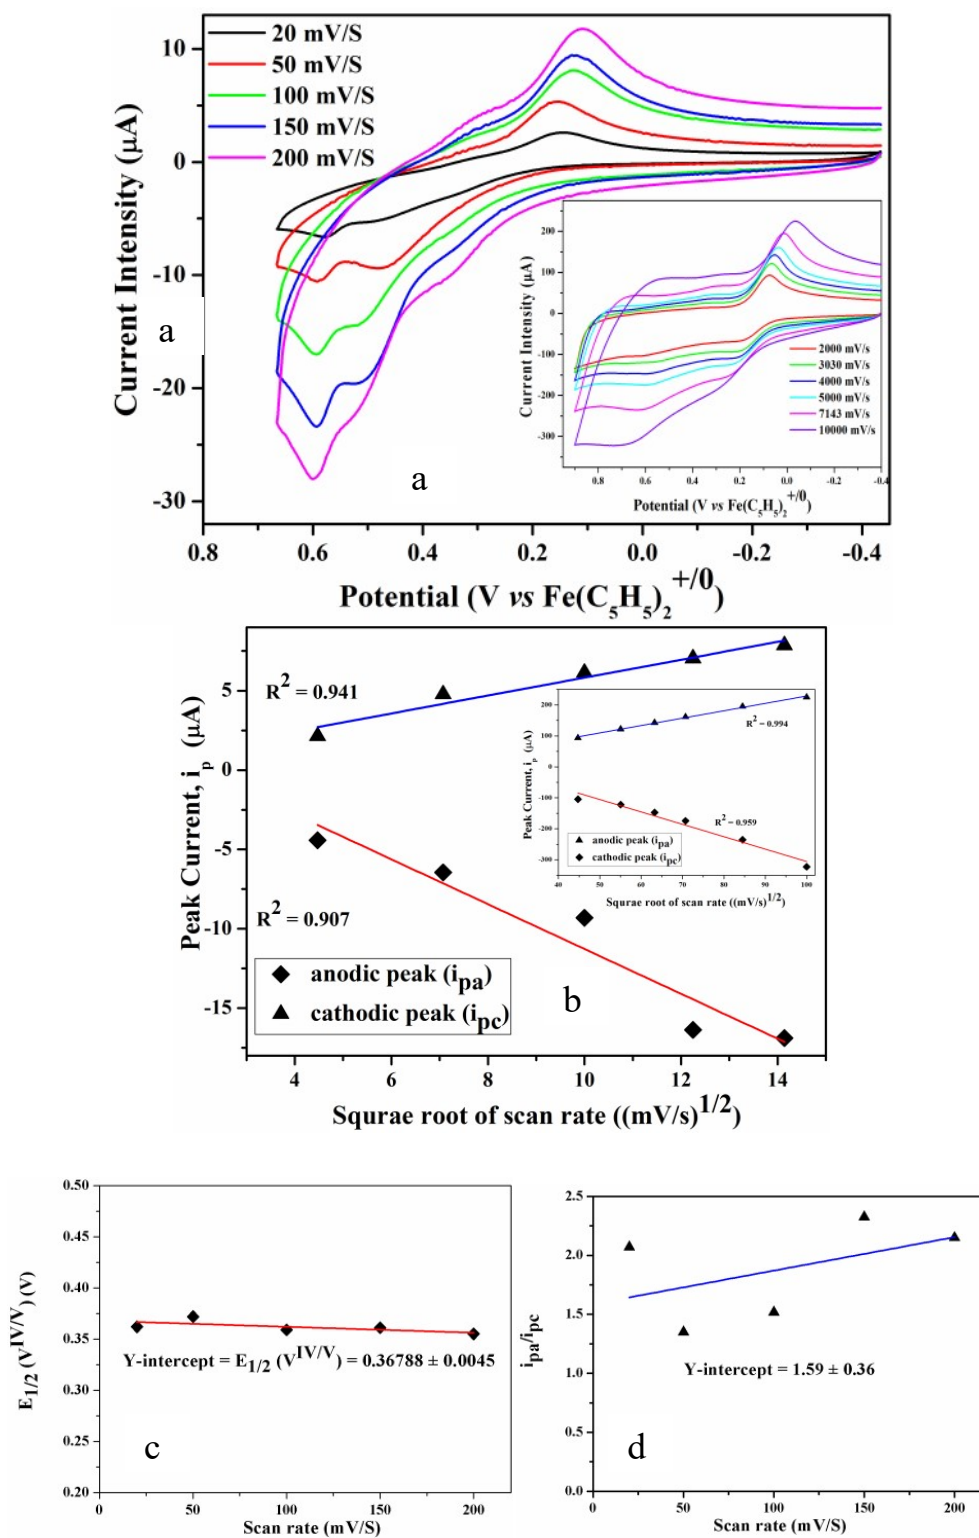

**Fig. S20.** Cyclic voltammograms data of complex **1** +  $\text{Ca}^{2+}$  ( $10^{-3}$  M) in presence of 0.1 M TBAP in acetonitrile (insert: at high scan rate). (a) scan rate dependence data for complex **1** +  $\text{Ca}^{2+}$ . (b) plot of peak current density vs. (scan rate) $^{1/2}$ . (c) plot of  $E_{1/2}$  value vs. scan rate. (d) plot of ratio of anodic to cathodic peak currents vs. scan rate.

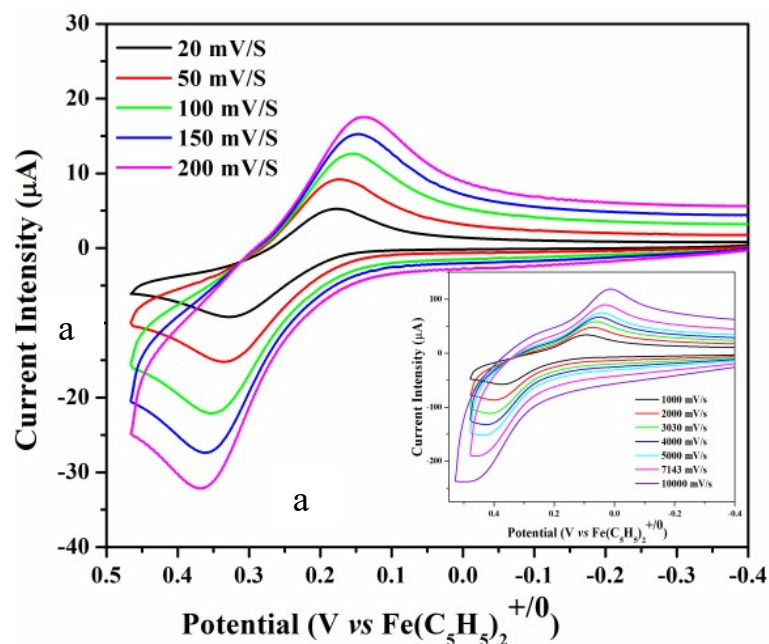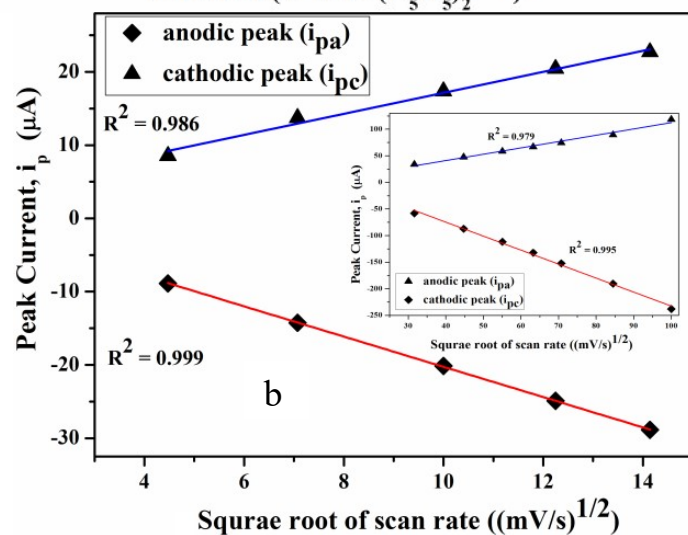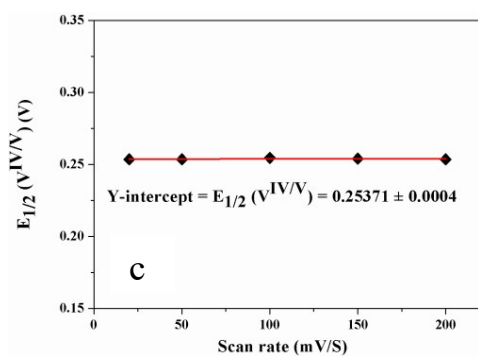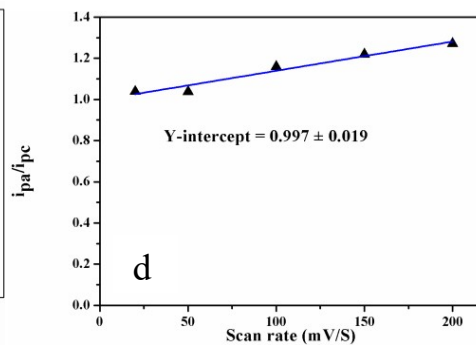

**Fig. S21.** Cyclic voltammograms data of complex **1** +  $\text{Ba}^{2+}$  ( $10^{-3}$  M) in presence of 0.1 M TBAP in acetonitrile (insert: at high scan rate). (a) scan rate dependence data for complex **1** +  $\text{Ba}^{2+}$ . (b) plot of peak current density vs.  $(\text{scan rate})^{1/2}$ . (c) plot of  $E_{1/2}$  value vs. scan rate. (d) plot of ratio of anodic to cathodic peak currents vs. scan rate.

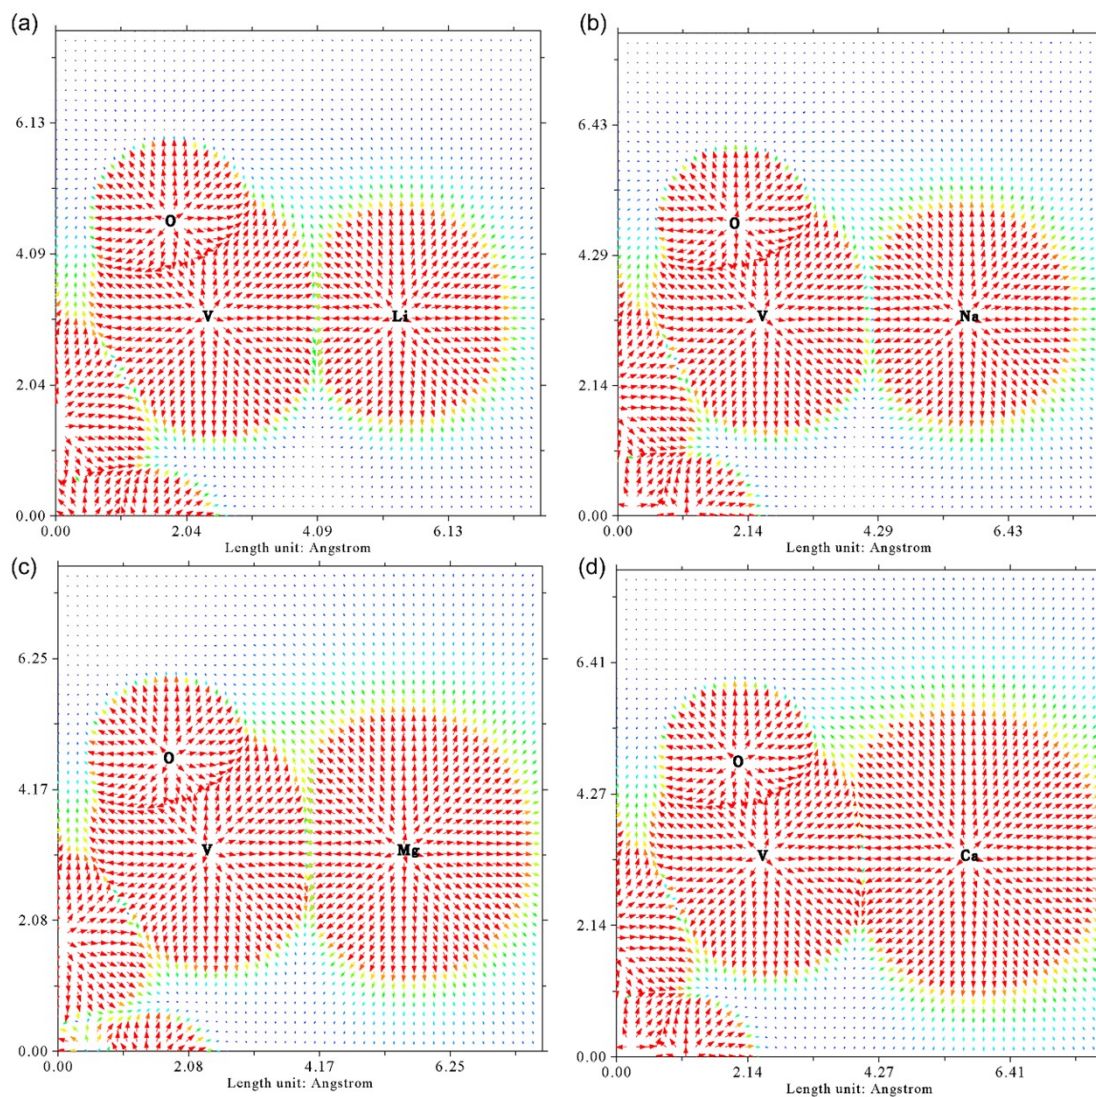

**Fig.**

**S22.** Vector electric field 2D maps of Li<sup>+</sup> (a), Na<sup>+</sup> (b), Mg<sup>2+</sup> (c) and Ca<sup>2+</sup> (d) at the RI-BP86-D3/def2-TZVP (COSMO=acetonitrile) level of theory.

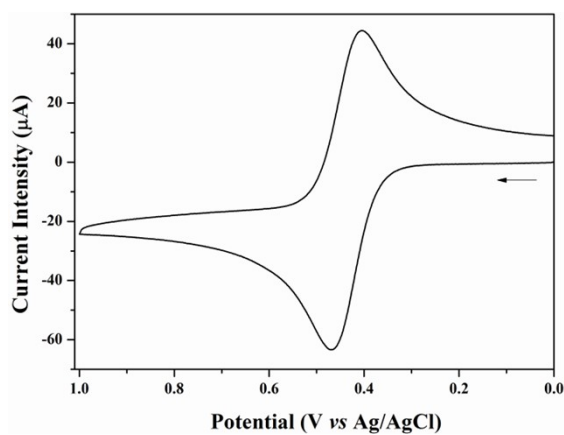

**Fig. S23.** Cyclic voltammograms of ferrocene (10<sup>-3</sup> M) at 100 mV/s in acetonitrile.



**Table S1.** Selected bond lengths (Å) and bond angles (°) of Complex 1

| Bond lengths (Å) |          | Bond angles (°)      |            |
|------------------|----------|----------------------|------------|
| V(1) – O(1)      | 1.598(2) | O(1) – V(1) – O(11)  | 111.63(10) |
| V(1) – O(11)     | 1.922(2) | O(1) – V(1) – O(30)  | 104.54(10) |
| V(1) – O(30)     | 1.939(2) | O(1) – V(1) – N(19)  | 103.45(10) |
| V(1) – N(19)     | 2.073(2) | O(1) – V(1) – N(22)  | 109.22(10) |
| V(1) – N(22)     | 2.054(2) | O(11) – V(1) – O(30) | 88.36(9)   |
|                  |          | O(11) – V(1) – N(19) | 87.86(9)   |
|                  |          | O(11) – V(1) – N(22) | 138.82(9)  |
|                  |          | O(30) – V(1) – N(19) | 151.14(9)  |
|                  |          | O(30) – V(1) – N(22) | 86.44(9)   |
|                  |          | N(19) – V(1) – N(22) | 77.82(9)   |

**Table S2.** Geometrical features of hydrogen bonding interactions (distances (Å) and angles (°)) of Complex 1

| D–H···A                                              | D–H (Å) | H···A (Å) | D···A (Å) | ∠D–H···A (°) |
|------------------------------------------------------|---------|-----------|-----------|--------------|
| O(51) – H(51A) ··· O(30)                             | 0.8700  | 2.4600    | 3.113(3)  | 133.00       |
| O(51) – H(51A) ··· O(31)                             | 0.8700  | 2.1500    | 2.953(3)  | 152.00       |
| O(51) – H(51B) ··· O(11)                             | 0.8700  | 2.3300    | 3.109(3)  | 149.00       |
| O(51) – H(51B) ··· O(41)                             | 0.8700  | 2.1700    | 2.897(3)  | 141.00       |
| O(52 <sup>k</sup> ) – H(52A <sup>k</sup> ) ··· O(51) | 0.8700  | 2.0600    | 2.905(4)  | 164.00       |
| O(52) – H(52B) ··· O(51)                             | 0.8700  | 2.0700    | 2.939(4)  | 176.00       |

$$^k = 2-x, 1-y, 2-z$$

**Table S3.** SHAPE analysis for the potassium and barium centres in complexes **1•K** and **1•Ba**, respectively (the lowest values are indicated in bold).

| Geometry                            | Symmetry | <b>1•K</b>   | <b>1•Ba</b> |
|-------------------------------------|----------|--------------|-------------|
| Enneagon                            | D9h      | 34.402       | 32.563      |
| Octagonal pyramid                   | C8v      | 22.764       | 22.968      |
| Heptagonal bipyramid                | D7h      | 16.056       | 12.368      |
| <b>Johnson triangular cupola J3</b> | C3v      | <b>8.626</b> | 14.450      |
| Capped cube J8                      | C4v      | 9.779        | 9.022       |
| Spherical-relaxed capped cube       | C4v      | 9.124        | 7.108       |
| Capped square antiprism J10         | C4v      | 12.233       | 4.657       |
| Spherical capped square antiprism   | C4v      | 11.424       | 3.784       |

|                                    |     |        |              |
|------------------------------------|-----|--------|--------------|
| Tricapped trigonal prism J51       | D3h | 12.586 | 5.876        |
| Spherical tricapped trigonal prism | D3h | 12.205 | 4.869        |
| Tridiminished icosahedron J63      | C3v | 11.164 | 13.735       |
| Hula-hoop                          | C2v | 11.366 | 6.433        |
| <b>Muffin</b>                      | Cs  | 9.730  | <b>2.290</b> |

**Table S4.** Selected bond lengths (Å) and bond angles (°) of Complex **1•K**

| <b>Bond lengths (Å)</b>          |            |                                   |           |
|----------------------------------|------------|-----------------------------------|-----------|
| V(1) – O(1)                      | 1.598(3)   | K(1) – O(31)                      | 2.788(3)  |
| V(1) – O(11)                     | 1.926(2)   | K(1) – O(41)                      | 2.815(3)  |
| V(1) – O(30)                     | 1.946(2)   | K(1) – F(3 <sup>a</sup> )         | 3.008(3)  |
| V(1) – N(19)                     | 2.054(3)   | K(1) – F(4 <sup>a</sup> )         | 2.777(3)  |
| V(1) – N(22)                     | 2.053(3)   | P(1) – F(1)                       | 1.591(3)  |
| K(1) – F(1)                      | 2.983(3)   | P(1) – F(2)                       | 1.607(3)  |
| K(1) – F(2)                      | 2.884(3)   | P(1) – F(3)                       | 1.608(3)  |
| K(1) – F(3)                      | 2.871(3)   | P(1) – F(4)                       | 1.604(3)  |
| K(1) – O(11)                     | 2.705(3)   | P(1) – F(5)                       | 1.586(3)  |
| K(1) – O(30)                     | 2.700(2)   | P(1) – F(6)                       | 1.564(3)  |
| <b>Bond angles (°)</b>           |            |                                   |           |
| O(1) – V(1) – O(11)              | 108.15(12) | F(2) – K(1) – F(3 <sup>a</sup> )  | 67.45(8)  |
| O(1) – V(1) – O(30)              | 110.44(12) | F(2) – K(1) – F(4 <sup>a</sup> )  | 112.78(8) |
| O(1) – V(1) – N(19)              | 105.52(15) | F(3) – K(1) – O(11)               | 120.34(9) |
| O(1) – V(1) – N(22)              | 105.46(13) | F(3) – K(1) – O(30)               | 143.02(8) |
| O(11) – V(1) – O(30)             | 85.79(10)  | F(3) – K(1) – O(31)               | 113.04(9) |
| O(11) – V(1) – N(19)             | 88.07(12)  | F(3) – K(1) – O(41)               | 82.98(8)  |
| O(11) – V(1) – N(22)             | 145.96(13) | F(3) – K(1) – F(3 <sup>a</sup> )  | 64.54(9)  |
| O(30) – V(1) – N(19)             | 143.65(14) | F(3) – K(1) – F(4 <sup>a</sup> )  | 91.77(8)  |
| O(30) – V(1) – N(22)             | 87.54 (12) | O(11) – K(1) – O(30)              | 58.37(7)  |
| N(19) – V(1) – N(22)             | 77.90(15)  | O(11) – K(1) – O(31)              | 115.66(7) |
| F(1) – K(1) – F(2)               | 44.54(7)   | O(11) – K(1) – O(41)              | 56.59(7)  |
| F(1) – K(1) – F(3)               | 45.02(7)   | F(3 <sup>a</sup> ) – K(1) – O(11) | 159.43(8) |
| F(1) – K(1) – O(11)              | 90.73(7)   | F(4 <sup>a</sup> ) – K(1) – O(11) | 113.91(8) |
| F(1) – K(1) – O(30)              | 99.62(7)   | O(30) – K(1) – O(31)              | 57.49(7)  |
| F(1) – K(1) – O(31)              | 103.97(8)  | O(30) – K(1) – O(41)              | 113.84(7) |
| F(1) – K(1) – O(41)              | 92.07(8)   | F(3 <sup>a</sup> ) – K(1) – O(30) | 131.57(8) |
| F(1) – K(1) – F(3 <sup>a</sup> ) | 103.39(7)  | F(4 <sup>a</sup> ) – K(1) – O(30) | 123.65(8) |
| F(1) – K(1) – F(4 <sup>a</sup> ) | 136.55(8)  | O(31) – K(1) – O(41)              | 162.65(8) |
| F(2) – K(1) – F(3)               | 45.68(8)   | F(3 <sup>a</sup> ) – K(1) – O(31) | 75.75(8)  |
| F(2) – K(1) – O(11)              | 131.46(8)  | F(4 <sup>a</sup> ) – K(1) – O(31) | 96.87(9)  |
| F(2) – K(1) – O(30)              | 104.25(8)  | F(3 <sup>a</sup> ) – K(1) – O(41) | 107.29(8) |

|                     |           |                                                |          |
|---------------------|-----------|------------------------------------------------|----------|
| F(2) – K(1) – O(31) | 70.44(7)  | F(4 <sup>a</sup> ) – K(1) – O(41)              | 75.18(9) |
| F(2) – K(1) – O(41) | 126.77(8) | F(3 <sup>a</sup> ) – K(1) – F(4 <sup>a</sup> ) | 45.86(8) |

<sup>a</sup> = 1-x,1-y,1-z

**Table S5.** Selected bond lengths (Å) and bond angles (°) of Complex **1•Ba**

| <b>Bond lengths (Å)</b>           |           |                                    |            |
|-----------------------------------|-----------|------------------------------------|------------|
| V(1) – O(1)                       | 1.598(8)  | Ba(1) – O(9)                       | 2.787(14)  |
| V(1) – O(11)                      | 1.923(6)  | Ba(1) – O(10)                      | 2.735(15)  |
| V(1) – O(30)                      | 1.924(6)  | Ba(1) – O(11)                      | 2.743(5)   |
| V(1) – N(19)                      | 2.039(10) | Ba(1) – O(30)                      | 2.749(6)   |
| V(1) – N(22)                      | 2.046(9)  | Ba(1) – O(31)                      | 2.850(7)   |
| Ba(1) – O(2)                      | 2.792(12) | Ba(1) – O(41)                      | 2.852(7)   |
| Ba(1) – O(6)                      | 2.872(13) | Ba(1) – O(1 <sup>b</sup> )         | 2.686(8)   |
| <b>Bond angles (°)</b>            |           |                                    |            |
| O(1) – V(1) – O(11)               | 109.0(3)  | O(6) – Ba(1) – O(41)               | 146.0(3)   |
| O(1) – V(1) – O(30)               | 110.8(3)  | O(1 <sup>b</sup> ) – Ba(1) – O(6)  | 126.6(4)   |
| O(1) – V(1) – N(19)               | 105.0(4)  | O(9) – Ba(1) – O(10)               | 76.6(4)    |
| O(1) – V(1) – N(22)               | 102.9(4)  | O(9) – Ba(1) – O(11)               | 107.0(3)   |
| O(11) – V(1) – O(30)              | 84.9(3)   | O(9) – Ba(1) – O(30)               | 154.1(3)   |
| O(11) – V(1) – N(19)              | 88.7(3)   | O(9) – Ba(1) – O(31)               | 144.3(3)   |
| O(11) – V(1) – N(22)              | 147.9(4)  | O(9) – Ba(1) – O(41)               | 66.6(3)    |
| O(30) – V(1) – N(19)              | 143.8(4)  | O(1 <sup>b</sup> ) – Ba(1) – O(9)  | 121.2(3)   |
| O(30) – V(1) – N(22)              | 87.6(3)   | O(10) – Ba(1) – O(11)              | 72.0(3)    |
| N(19) – V(1) – N(22)              | 79.2(4)   | O(10) – Ba(1) – O(30)              | 79.0(3)    |
| O(2) – Ba(1) – O(6)               | 72.9(4)   | O(10) – Ba(1) – O(31)              | 112.2(4)   |
| O(2) – Ba(1) – O(9)               | 76.6(4)   | O(10) – Ba(1) – O(41)              | 97.6(4)    |
| O(2) – Ba(1) – O(10)              | 145.1(4)  | O(1 <sup>b</sup> ) – Ba(1) – O(10) | 147.2(3)   |
| O(2) – Ba(1) – O(11)              | 137.9(3)  | O(11) – Ba(1) – O(30)              | 56.42(18)  |
| O(2) – Ba(1) – O(30)              | 129.3(3)  | O(11) – Ba(1) – O(31)              | 108.60(18) |
| O(2) – Ba(1) – O(31)              | 79.0(3)   | O(11) – Ba(1) – O(41)              | 55.24(18)  |
| O(2) – Ba(1) – O(41)              | 91.8(3)   | O(1 <sup>b</sup> ) – Ba(1) – O(11) | 76.2(2)    |
| O(1 <sup>b</sup> ) – Ba(1) – O(2) | 67.4(3)   | O(30) – Ba(1) – O(31)              | 55.40(18)  |
| O(6) – Ba(1) – O(9)               | 80.3(4)   | O(30) – Ba(1) – O(41)              | 108.67(18) |
| O(6) – Ba(1) – O(10)              | 81.0(4)   | O(1 <sup>b</sup> ) – Ba(1) – O(30) | 77.0(2)    |
| O(6) – Ba(1) – O(11)              | 149.0(3)  | O(31) – Ba(1) – O(41)              | 140.1(2)   |
| O(6) – Ba(1) – O(30)              | 104.4(3)  | O(1 <sup>b</sup> ) – Ba(1) – O(31) | 70.8(2)    |
| O(6) – Ba(1) – O(31)              | 67.8(3)   | O(1 <sup>b</sup> ) – Ba(1) – O(41) | 69.8(2)    |

<sup>b</sup> = 1-x,1-y,1-z

**Table S6.** Binding constant of metal ions towards complex **1**.

| Metal ions interacts with complex <b>1</b> | Binding constant ( $K_b$ ) for 1:1 complexation in acetonitrile |
|--------------------------------------------|-----------------------------------------------------------------|
| $K^+$                                      | $0.88 \times 10^4$                                              |
| $Ca^{2+}$                                  | $1.15 \times 10^4$                                              |
| $Ba^{2+}$                                  | $1.46 \times 10^4$                                              |

**Table S7.** Experimental and theoretical (in parenthesis) distances of complexes **1•K** and **1•Ba**

|             | V...M         | V-N                         | V=O           |
|-------------|---------------|-----------------------------|---------------|
| <b>1•K</b>  | 3.722 (3.983) | 2.054,2.053 (2.046, 2.066)  | 1.598 (1.610) |
| <b>1•Ba</b> | 3.829 (3.797) | 2.039, 2.040 (2.038, 2.056) | 1.598 (1.602) |

**Table S8.** Crystallographic data and structure refinement parameters of complexes **1**, **1•K** and **1•Ba**.

| Complex                                    | <b>1</b>                       | <b>1•K</b>                             | <b>1•Ba</b>                    |
|--------------------------------------------|--------------------------------|----------------------------------------|--------------------------------|
| Chemical formula                           | $C_{20}H_{22}N_2O_5V, 2(H_2O)$ | $C_{40}H_{44}F_{12}K_2N_4O_{10}P_2V_2$ | $C_{20}H_{22}BaCl_2N_2O_{14}V$ |
| Formula weight                             | 457.37                         | 1210.81                                | 773.57                         |
| Crystal system                             | monoclinic                     | monoclinic                             | triclinic                      |
| Space group                                | $P2_1/c$                       | $I2/a$                                 | $P\bar{1}$                     |
| $a$ (Å)                                    | 10.1320(15)                    | 24.8898(12)                            | 11.5816(4)                     |
| $b$ (Å)                                    | 19.209(2)                      | 8.4307(4)                              | 12.2757(4)                     |
| $c$ (Å)                                    | 10.8529(15)                    | 25.4214(10)                            | 12.4432(4)                     |
| $\alpha$ (°)                               | 90                             | 90                                     | 61.585(1)                      |
| $\beta$ (°)                                | 105.233(5)                     | 100.290(4)                             | 62.339(1)                      |
| $\gamma$ (°)                               | 90                             | 90                                     | 71.137(1)                      |
| $V$ (Å <sup>3</sup> )                      | 2038.0(5)                      | 5248.6(4)                              | 1366.16(8)                     |
| $Z$                                        | 4                              | 4                                      | 2                              |
| $\rho_{calc}$ (g cm <sup>-3</sup> )        | 1.491                          | 1.532                                  | 1.880                          |
| T (K)                                      | 132                            | 100                                    | 100                            |
| $\mu$ (Mo K $\alpha$ ) (mm <sup>-1</sup> ) | 0.532                          | 0.673                                  | 2.041                          |
| $F(000)$                                   | 956                            | 2456                                   | 762                            |
| $R$ (int)                                  | 0.058                          | 0.063                                  | 0.025                          |

|                                                |                |                |                |
|------------------------------------------------|----------------|----------------|----------------|
| Total reflections                              | 15069          | 28657          | 13715          |
| Unique reflections                             | 4163           | 6009           | 4806           |
| $I > 2\sigma(I)$                               | 3483           | 5142           | 4473           |
| $R_1^a, wR_2^b$                                | 0.0566, 0.1548 | 0.0648, 0.1856 | 0.0677, 0.1690 |
| $R$ (all)                                      | 0.0681         | 0.0732         | 0.0719         |
| GOFC on $F^2$                                  | 1.07           | 1.05           | 1.05           |
| Residual electron<br>Density, eÅ <sup>-3</sup> | -0.71, 0.63    | -0.96, 1.76    | -1.70, 2.50    |

### Cartesian Coordinates:

#### V(IV) Geometries:

**1**

|   |           |            |            |
|---|-----------|------------|------------|
| V | 6.0572662 | 5.1425756  | -6.1792387 |
| O | 7.0091225 | 4.0054511  | -4.9105504 |
| O | 5.0806269 | 5.8422284  | -4.6524110 |
| O | 5.1402971 | 4.1768523  | -7.0923822 |
| O | 7.3705459 | 1.9886429  | -3.2543557 |
| O | 3.5759033 | 5.9145456  | -2.4975644 |
| N | 7.8683364 | 5.4173546  | -7.1412823 |
| C | 4.3151278 | 6.9030631  | -4.5049630 |
| C | 8.0732040 | 3.2615725  | -5.1089625 |
| N | 5.7937790 | 6.9871299  | -7.0326922 |
| C | 3.4921099 | 6.9896536  | -3.3336985 |
| C | 3.4521917 | 9.1216789  | -5.1739219 |
| H | 3.4455645 | 9.9403910  | -5.8958369 |
| C | 8.3196252 | 2.1620385  | -4.2197918 |
| C | 4.2727924 | 7.9906076  | -5.4276947 |
| C | 2.6695238 | 9.1753146  | -4.0382286 |
| H | 2.0325862 | 10.0379004 | -3.8424823 |
| C | 2.6883783 | 8.1061881  | -3.1181334 |
| H | 2.0631566 | 8.1634471  | -2.2283232 |
| C | 7.5489665 | 0.8943561  | -2.3409805 |
| H | 8.4790614 | 1.0061937  | -1.7612832 |
| H | 6.6880837 | 0.9312469  | -1.6652492 |
| H | 7.5601135 | -0.0706951 | -2.8723852 |
| C | 5.0558991 | 7.9774676  | -6.6282974 |
| H | 5.0126940 | 8.8805949  | -7.2532713 |
| C | 9.4484140 | 1.3633592  | -4.3814669 |
| H | 9.6246744 | 0.5249978  | -3.7090956 |
| C | 2.7663475 | 5.9327325  | -1.3107538 |
| H | 1.6942509 | 5.9840919  | -1.5600277 |
| H | 2.9782454 | 4.9901355  | -0.7953776 |
| H | 3.0340521 | 6.7788145  | -0.6577404 |

|   |            |           |             |
|---|------------|-----------|-------------|
| C | 8.8915865  | 4.6165832 | -7.0382751  |
| H | 9.7641461  | 4.8031408 | -7.6772682  |
| C | 9.0247812  | 3.5044267 | -6.1451321  |
| C | 6.5373354  | 7.0735433 | -8.2851834  |
| H | 6.5152741  | 8.0886827 | -8.7094159  |
| C | 7.9874226  | 6.6272022 | -8.0248195  |
| C | 10.3807150 | 1.6244179 | -5.4095847  |
| H | 11.2585525 | 0.9861617 | -5.5092515  |
| C | 10.1777322 | 2.6815355 | -6.2730309  |
| H | 10.8945382 | 2.8996565 | -7.0665778  |
| C | 8.7419996  | 7.7086149 | -7.2361640  |
| H | 9.7596318  | 7.3659781 | -7.0039355  |
| H | 8.8074911  | 8.6312511 | -7.8290395  |
| H | 8.2277825  | 7.9317083 | -6.2907351  |
| C | 8.6712404  | 6.3338894 | -9.3638499  |
| H | 8.5550144  | 7.2041162 | -10.0238148 |
| H | 9.7482730  | 6.1552600 | -9.2495423  |
| H | 8.2148153  | 5.4620421 | -9.8525738  |
| H | 6.0670087  | 6.3826074 | -9.0032726  |

**1•Li<sup>+</sup>**

|   |           |            |            |
|---|-----------|------------|------------|
| V | 6.9907476 | 4.3392785  | 6.7264897  |
| O | 5.4463117 | 3.8870271  | 6.7557148  |
| O | 7.4218813 | 5.4368324  | 8.2860732  |
| O | 8.1926094 | 3.1642678  | 7.7093991  |
| O | 7.5086463 | 6.2376615  | 10.7426779 |
| O | 9.4467713 | 1.9876378  | 9.6086202  |
| N | 7.1365163 | 6.0259009  | 5.5868135  |
| N | 7.7748765 | 3.5449117  | 5.0291526  |
| C | 7.1306281 | 6.7124452  | 8.4826181  |
| C | 7.1615241 | 7.1913083  | 9.8228082  |
| C | 6.8534620 | 8.5197191  | 10.0972320 |
| H | 6.8539472 | 8.8866188  | 11.1226691 |
| C | 6.5440562 | 9.4084207  | 9.0453698  |
| H | 6.3078685 | 10.4460933 | 9.2799219  |
| C | 6.5577795 | 8.9751654  | 7.7327603  |
| H | 6.3474479 | 9.6682336  | 6.9167078  |
| C | 6.8492623 | 7.6193282  | 7.4252025  |
| C | 6.9692410 | 7.2351129  | 6.0431260  |
| H | 6.9560652 | 8.0671300  | 5.3274159  |
| C | 7.4791001 | 5.8077331  | 4.1370427  |
| C | 6.5819187 | 6.6098600  | 3.1909703  |
| H | 6.7898194 | 7.6863080  | 3.2439094  |
| H | 6.7703962 | 6.2912550  | 2.1566969  |
| H | 5.5213587 | 6.4386184  | 3.4218323  |
| C | 8.9616997 | 6.1670859  | 3.9553965  |
| H | 9.5929094 | 5.5681968  | 4.6266721  |
| H | 9.2684320 | 5.9770724  | 2.9179553  |
| H | 9.1271622 | 7.2294427  | 4.1811605  |
| C | 7.2652685 | 4.2962893  | 3.8821655  |
| H | 6.1866035 | 4.0900703  | 3.8004385  |

|    |            |            |            |
|----|------------|------------|------------|
| H  | 7.7514017  | 3.9936343  | 2.9429808  |
| C  | 8.5798476  | 2.5330812  | 4.8918433  |
| H  | 8.8644718  | 2.2301713  | 3.8749122  |
| C  | 9.1608568  | 1.7816674  | 5.9740161  |
| C  | 10.0075884 | 0.6813583  | 5.6787140  |
| H  | 10.1528947 | 0.3912343  | 4.6371039  |
| C  | 10.6404680 | -0.0088083 | 6.6971964  |
| H  | 11.2824612 | -0.8590633 | 6.4686839  |
| C  | 10.4799196 | 0.3877718  | 8.0422913  |
| H  | 11.0061198 | -0.1547369 | 8.8262814  |
| C  | 9.6629168  | 1.4685237  | 8.3549643  |
| C  | 8.9633252  | 2.1583498  | 7.3279557  |
| C  | 7.5725091  | 6.6401377  | 12.1246248 |
| H  | 8.3215275  | 7.4337699  | 12.2673489 |
| H  | 6.5889304  | 6.9847170  | 12.4775706 |
| H  | 7.8711384  | 5.7452563  | 12.6794102 |
| C  | 10.1196797 | 1.3517493  | 10.7152473 |
| H  | 9.8148905  | 1.9076290  | 11.6072512 |
| H  | 9.8064006  | 0.3013673  | 10.8074301 |
| H  | 11.2114206 | 1.4116366  | 10.5934537 |
| Li | 8.2979196  | 4.0701277  | 9.4648059  |

### 1•Na<sup>+</sup>

|   |           |            |            |
|---|-----------|------------|------------|
| V | 7.1092651 | 4.3759189  | 6.8053271  |
| O | 5.5743980 | 3.8944528  | 6.8936752  |
| O | 7.5014501 | 5.5442356  | 8.3249738  |
| O | 8.3414384 | 3.1849812  | 7.7413622  |
| O | 7.5003258 | 6.4312865  | 10.7855850 |
| O | 9.5118436 | 1.7792766  | 9.6114838  |
| N | 7.1793945 | 6.0483848  | 5.6153718  |
| N | 7.8160759 | 3.5711800  | 5.0724919  |
| C | 7.1520067 | 6.8072913  | 8.4885313  |
| C | 7.1414818 | 7.3331098  | 9.8156793  |
| C | 6.7844373 | 8.6574747  | 10.0450591 |
| H | 6.7619947 | 9.0541820  | 11.0589891 |
| C | 6.4530097 | 9.5057679  | 8.9674952  |
| H | 6.1788630 | 10.5409572 | 9.1696957  |
| C | 6.4908144 | 9.0313810  | 7.6708047  |
| H | 6.2587536 | 9.6887639  | 6.8312783  |
| C | 6.8360435 | 7.6789644  | 7.4085300  |
| C | 6.9631398 | 7.2609916  | 6.0394998  |
| H | 6.9049588 | 8.0701365  | 5.3005826  |
| C | 7.5076271 | 5.8175706  | 4.1657464  |
| C | 6.6180569 | 6.6182072  | 3.2107988  |
| H | 6.8436496 | 7.6920398  | 3.2397958  |
| H | 6.7973618 | 6.2766362  | 2.1821860  |
| H | 5.5556344 | 6.4686218  | 3.4481388  |
| C | 8.9931132 | 6.1604413  | 3.9723285  |
| H | 9.6222654 | 5.5636035  | 4.6471912  |
| H | 9.2928306 | 5.9557353  | 2.9355280  |
| H | 9.1679721 | 7.2239004  | 4.1856862  |

|    |            |            |            |
|----|------------|------------|------------|
| C  | 7.2758927  | 4.3096886  | 3.9327047  |
| H  | 6.1936235  | 4.1103682  | 3.8865199  |
| H  | 7.7324863  | 3.9921870  | 2.9834910  |
| C  | 8.6007252  | 2.5486708  | 4.9072538  |
| H  | 8.8440167  | 2.2436077  | 3.8801459  |
| C  | 9.1915730  | 1.7741521  | 5.9634358  |
| C  | 9.9750836  | 0.6435074  | 5.6136338  |
| H  | 10.0836922 | 0.3830461  | 4.5595263  |
| C  | 10.5856059 | -0.1157419 | 6.5934569  |
| H  | 11.1821412 | -0.9878565 | 6.3270389  |
| C  | 10.4483851 | 0.2370905  | 7.9516794  |
| H  | 10.9450227 | -0.3668606 | 8.7093447  |
| C  | 9.6933068  | 1.3456138  | 8.3213265  |
| C  | 9.0339714  | 2.1355073  | 7.3316935  |
| C  | 7.5101403  | 6.8926881  | 12.1510782 |
| H  | 8.2344383  | 7.7104126  | 12.2837443 |
| H  | 6.5076358  | 7.2245867  | 12.4595430 |
| H  | 7.8129547  | 6.0299931  | 12.7532695 |
| C  | 10.1254590 | 1.0068561  | 10.6633886 |
| H  | 9.8417521  | 1.5002451  | 11.5985825 |
| H  | 9.7465098  | -0.0258823 | 10.6614341 |
| H  | 11.2210898 | 1.0068676  | 10.5622716 |
| Na | 8.5072881  | 4.1303603  | 9.9807214  |

### 1•K<sup>+</sup>

|   |           |            |            |
|---|-----------|------------|------------|
| V | 7.2616202 | 4.4116362  | 6.8962559  |
| K | 9.1679878 | 4.3598400  | 10.3024979 |
| O | 5.7469500 | 3.8901938  | 7.0654127  |
| O | 7.6192326 | 5.6513868  | 8.3782570  |
| O | 8.5497091 | 3.2162223  | 7.7567512  |
| O | 7.4452583 | 6.6042019  | 10.8433599 |
| O | 9.6588749 | 1.6438467  | 9.5823405  |
| N | 7.2447756 | 6.0646606  | 5.6569306  |
| N | 7.8613164 | 3.5883135  | 5.1209166  |
| C | 7.1839847 | 6.8922300  | 8.5122789  |
| C | 7.0874044 | 7.4514661  | 9.8256564  |
| C | 6.6536241 | 8.7611238  | 10.0069832 |
| H | 6.5742412 | 9.1773027  | 11.0100145 |
| C | 6.3176839 | 9.5696267  | 8.9022258  |
| H | 5.9871268 | 10.5943429 | 9.0703613  |
| C | 6.4182498 | 9.0634273  | 7.6219888  |
| H | 6.1738775 | 9.6827747  | 6.7572628  |
| C | 6.8400040 | 7.7245831  | 7.4081412  |
| C | 6.9835748 | 7.2772156  | 6.0526219  |
| H | 6.8800047 | 8.0625259  | 5.2937264  |
| C | 7.5359490 | 5.8197505  | 4.2026530  |
| C | 6.6351954 | 6.6193597  | 3.2567024  |
| H | 6.8837279 | 7.6884786  | 3.2530478  |
| H | 6.7764899 | 6.2506017  | 2.2316584  |
| H | 5.5770228 | 6.4983418  | 3.5272201  |
| C | 9.0200136 | 6.1442330  | 3.9689198  |



|   |            |            |            |
|---|------------|------------|------------|
| H | 9.6603853  | 5.5471288  | 4.6327510  |
| H | 9.2918942  | 5.9280422  | 2.9266343  |
| H | 9.2094749  | 7.2076914  | 4.1692306  |
| C | 7.2780398  | 4.3162025  | 3.9972176  |
| H | 6.1923887  | 4.1294205  | 4.0022724  |
| H | 7.6883175  | 3.9803448  | 3.0333852  |
| C | 8.6104484  | 2.5471942  | 4.9192510  |
| H | 8.7904568  | 2.2316860  | 3.8820977  |
| C | 9.2225612  | 1.7517955  | 5.9447167  |
| C | 9.9206957  | 0.5825089  | 5.5462290  |
| H | 9.9678513  | 0.3344696  | 4.4846217  |
| C | 10.5174105 | -0.2316480 | 6.4886468  |
| H | 11.0483314 | -1.1345618 | 6.1880968  |
| C | 10.4405745 | 0.1038877  | 7.8544121  |
| H | 10.9143159 | -0.5487188 | 8.5857404  |
| C | 9.7726666  | 1.2520298  | 8.2722836  |
| C | 9.1435499  | 2.1158498  | 7.3211657  |
| C | 7.3046985  | 7.0905038  | 12.1923244 |
| H | 7.9706022  | 7.9475410  | 12.3747750 |
| H | 6.2621091  | 7.3742863  | 12.4004951 |
| H | 7.5915952  | 6.2566776  | 12.8416997 |
| C | 10.2182919 | 0.7728256  | 10.5855989 |
| H | 9.9830079  | 1.2371370  | 11.5490439 |
| H | 9.7575095  | -0.2251718 | 10.5392708 |
| H | 11.3099195 | 0.6897900  | 10.4729509 |

### 1•Mg<sup>2+</sup>

|   |           |           |            |
|---|-----------|-----------|------------|
| V | 5.8459138 | 5.0499563 | -6.8640062 |
| O | 6.5302174 | 3.8284976 | -5.4994543 |
| O | 4.7436035 | 5.4233179 | -5.2749993 |
| O | 5.0948280 | 4.2885662 | -8.0560804 |
| O | 6.7356407 | 2.5345459 | -3.3373595 |
| O | 3.9922897 | 5.2488493 | -2.8509933 |
| N | 7.7776300 | 5.3784139 | -7.4158330 |
| C | 4.3027029 | 6.5710468 | -4.7600991 |
| C | 7.7327398 | 3.3008193 | -5.3055973 |
| N | 5.7331470 | 7.0189163 | -7.2824976 |
| C | 3.8252784 | 6.5072369 | -3.4344972 |
| C | 3.8233852 | 8.9530258 | -4.7850874 |
| H | 3.8565400 | 9.9161568 | -5.2958693 |
| C | 7.8792874 | 2.5274668 | -4.1366919 |
| C | 4.3719734 | 7.8159530 | -5.4278658 |
| C | 3.2746327 | 8.8513649 | -3.5156940 |
| H | 2.8515231 | 9.7300602 | -3.0308244 |
| C | 3.2939038 | 7.6281685 | -2.8149824 |
| H | 2.9075632 | 7.5815404 | -1.7982076 |
| C | 6.7862106 | 1.8037485 | -2.0784906 |
| H | 7.5833495 | 2.2116921 | -1.4442999 |
| H | 5.8109534 | 1.9590669 | -1.6078859 |
| H | 6.9421676 | 0.7365944 | -2.2769553 |
| C | 5.1023868 | 7.9727722 | -6.6656243 |

|    |            |           |             |
|----|------------|-----------|-------------|
| H  | 5.1634729  | 8.9892750 | -7.0760977  |
| C  | 9.0788982  | 1.8898609 | -3.8628351  |
| H  | 9.2018637  | 1.2712275 | -2.9752697  |
| C  | 3.5071911  | 5.0615696 | -1.4907955  |
| H  | 2.4249929  | 5.2369229 | -1.4594164  |
| H  | 3.7249409  | 4.0192845 | -1.2403344  |
| H  | 4.0406430  | 5.7346984 | -0.8082283  |
| C  | 8.8052335  | 4.6332601 | -7.1145516  |
| H  | 9.7759864  | 4.8755890 | -7.5659403  |
| C  | 8.8400519  | 3.5680258 | -6.1393559  |
| C  | 6.5660849  | 7.2371881 | -8.4667922  |
| H  | 6.6391523  | 8.3022739 | -8.7284095  |
| C  | 7.9829029  | 6.6530937 | -8.2045628  |
| C  | 10.1631887 | 2.0679315 | -4.7496518  |
| H  | 11.1031317 | 1.5605083 | -4.5368028  |
| C  | 10.0618143 | 2.9090777 | -5.8468591  |
| H  | 10.9288363 | 3.0922645 | -6.4826041  |
| C  | 8.7798388  | 7.6252312 | -7.3225249  |
| H  | 9.7734118  | 7.2181652 | -7.0926235  |
| H  | 8.9092446  | 8.5805641 | -7.8480543  |
| H  | 8.2545302  | 7.8118180 | -6.3750926  |
| C  | 8.6757911  | 6.3861208 | -9.5416284  |
| H  | 8.6864751  | 7.3090832 | -10.1366629 |
| H  | 9.7180073  | 6.0713548 | -9.4004617  |
| H  | 8.1414150  | 5.6102165 | -10.1061361 |
| Mg | 5.2465601  | 3.9479366 | -3.9401711  |
| H  | 6.0947535  | 6.7034306 | -9.3061503  |

### 1•Ca<sup>2+</sup>

|   |           |           |            |
|---|-----------|-----------|------------|
| V | 6.0180606 | 5.1373026 | -6.4294056 |
| O | 6.8977179 | 4.0706052 | -5.0361478 |
| O | 5.0629754 | 5.7106042 | -4.8120065 |
| O | 5.1477190 | 4.2007308 | -7.3936677 |
| O | 7.2056413 | 2.3075696 | -3.1877839 |
| O | 3.8346380 | 5.7252009 | -2.5505585 |
| N | 7.8633300 | 5.4065932 | -7.2644475 |
| C | 4.3324042 | 6.8046840 | -4.5731013 |
| C | 7.9869472 | 3.3086502 | -5.1576078 |
| N | 5.7910361 | 7.0210839 | -7.1325358 |
| C | 3.6326237 | 6.8451516 | -3.3474387 |
| C | 3.4789394 | 9.0307737 | -5.0861188 |
| H | 3.4352338 | 9.8887833 | -5.7579419 |
| C | 8.1897265 | 2.3237980 | -4.1672567 |
| C | 4.2778397 | 7.9179746 | -5.4474229 |
| C | 2.7654433 | 9.0318638 | -3.8988054 |
| H | 2.1469147 | 9.8872769 | -3.6304301 |
| C | 2.8442534 | 7.9391263 | -3.0143179 |
| H | 2.2942164 | 7.9663562 | -2.0754161 |
| C | 7.3085041 | 1.2874493 | -2.1568810 |
| H | 8.2318138 | 1.4254017 | -1.5799483 |
| H | 6.4380589 | 1.4318824 | -1.5093516 |

|    |            |           |             |
|----|------------|-----------|-------------|
| H  | 7.2732134  | 0.2898715 | -2.6130486  |
| C  | 5.0560497  | 7.9821197 | -6.6614090  |
| H  | 5.0246609  | 8.9314230 | -7.2121558  |
| C  | 9.2967783  | 1.4870629 | -4.2208868  |
| H  | 9.4525897  | 0.7143767 | -3.4699919  |
| C  | 3.1136558  | 5.6582513 | -1.2895789  |
| H  | 2.0323639  | 5.6797011 | -1.4756214  |
| H  | 3.3930806  | 4.7008173 | -0.8369570  |
| H  | 3.4198537  | 6.4845024 | -0.6354188  |
| C  | 8.8717718  | 4.5993778 | -7.1067891  |
| H  | 9.7846599  | 4.7808584 | -7.6879597  |
| C  | 8.9473275  | 3.4947403 | -6.1801885  |
| C  | 6.5835104  | 7.1660041 | -8.3554809  |
| H  | 6.6031657  | 8.2064186 | -8.7100015  |
| C  | 8.0206385  | 6.6616484 | -8.0856217  |
| C  | 10.2380838 | 1.6494547 | -5.2569058  |
| H  | 11.1056272 | 0.9917206 | -5.2905697  |
| C  | 10.0801975 | 2.6435991 | -6.2083592  |
| H  | 10.8288286 | 2.7861734 | -6.9884547  |
| C  | 8.7800261  | 7.6775797 | -7.2184796  |
| H  | 9.7845382  | 7.3012168 | -6.9830605  |
| H  | 8.8781137  | 8.6285682 | -7.7587282  |
| H  | 8.2492380  | 7.8621592 | -6.2737536  |
| C  | 8.7288046  | 6.4126749 | -9.4185792  |
| H  | 8.6722603  | 7.3230357 | -10.0298932 |
| H  | 9.7924663  | 6.1795245 | -9.2803102  |
| H  | 8.2499378  | 5.5912659 | -9.9683295  |
| Ca | 5.5264008  | 4.1103933 | -3.2218845  |
| H  | 6.1144009  | 6.5403467 | -9.1308997  |

**1•Ba<sup>2+</sup>**

|   |           |           |            |
|---|-----------|-----------|------------|
| V | 6.1461275 | 5.2140307 | -6.1262929 |
| O | 7.1528368 | 4.1475008 | -4.8025571 |
| O | 5.2319974 | 5.9372057 | -4.5367990 |
| O | 5.2220801 | 4.2111235 | -6.9686932 |
| O | 7.5320555 | 2.1607687 | -3.1115462 |
| O | 3.6864476 | 6.0072833 | -2.3965939 |
| N | 7.9192320 | 5.4365399 | -7.1429449 |
| C | 4.3609020 | 6.9506526 | -4.4543831 |
| C | 8.1311853 | 3.2861437 | -5.0954750 |
| N | 5.8444466 | 7.0253227 | -7.0100799 |
| C | 3.5204945 | 7.0271016 | -3.3120742 |
| C | 3.3375846 | 9.0381405 | -5.2493885 |
| H | 3.2772103 | 9.8179891 | -6.0097292 |
| C | 8.3680334 | 2.2017624 | -4.2098235 |
| C | 4.2553447 | 7.9746043 | -5.4335943 |
| C | 2.5229330 | 9.0804446 | -4.1330247 |
| H | 1.8102367 | 9.8928521 | -3.9964309 |
| C | 2.6131838 | 8.0707409 | -3.1596924 |
| H | 1.9701025 | 8.1167613 | -2.2828286 |
| C | 7.6895386 | 1.0527148 | -2.1920507 |

|    |            |           |            |
|----|------------|-----------|------------|
| H  | 8.6891421  | 1.0688292 | -1.7367851 |
| H  | 6.9285882  | 1.1947048 | -1.4169952 |
| H  | 7.5129640  | 0.0995269 | -2.7088140 |
| C  | 5.0591417  | 7.9835736 | -6.6269262 |
| H  | 4.9796618  | 8.8763694 | -7.2613149 |
| C  | 9.3730324  | 1.2758372 | -4.4695704 |
| H  | 9.5384525  | 0.4378736 | -3.7950049 |
| C  | 2.7743101  | 5.9625028 | -1.2707673 |
| H  | 1.7363236  | 5.8934072 | -1.6235265 |
| H  | 3.0313926  | 5.0561737 | -0.7122627 |
| H  | 2.9096497  | 6.8428049 | -0.6281231 |
| C  | 8.8793027  | 4.5617429 | -7.1145842 |
| H  | 9.7255106  | 4.6874052 | -7.8007805 |
| C  | 8.9734211  | 3.4288939 | -6.2306499 |
| C  | 6.6035237  | 7.1229051 | -8.2563171 |
| H  | 6.5832094  | 8.1419069 | -8.6688044 |
| C  | 8.0517575  | 6.6738276 | -7.9851044 |
| C  | 10.1919712 | 1.4185807 | -5.6051059 |
| H  | 10.9779348 | 0.6877519 | -5.7913629 |
| C  | 10.0067275 | 2.4865956 | -6.4639847 |
| H  | 10.6518220 | 2.6179118 | -7.3335307 |
| C  | 8.7851179  | 7.7219109 | -7.1328033 |
| H  | 9.7988784  | 7.3720731 | -6.8963729 |
| H  | 8.8560213  | 8.6685605 | -7.6851391 |
| H  | 8.2529311  | 7.9051356 | -6.1886183 |
| C  | 8.7680449  | 6.4351294 | -9.3154311 |
| H  | 8.6739971  | 7.3363996 | -9.9352340 |
| H  | 9.8409331  | 6.2468431 | -9.1795394 |
| H  | 8.3207536  | 5.5908818 | -9.8580413 |
| Ba | 5.8805265  | 4.3189715 | -2.4779402 |
| H  | 6.1392653  | 6.4390361 | -8.9844726 |

#### V(V) Geometries:

**1**

|   |           |            |            |
|---|-----------|------------|------------|
| V | 6.0655227 | 5.1068862  | -6.1697388 |
| O | 7.1087670 | 4.2666868  | -4.9150462 |
| O | 4.7276241 | 5.6398986  | -5.0525393 |
| O | 5.4861923 | 4.0034845  | -7.1586290 |
| O | 7.4639708 | 2.3939480  | -3.0712658 |
| O | 3.2353323 | 5.5753213  | -2.8612848 |
| N | 7.8406225 | 5.4284482  | -7.2024338 |
| C | 4.2365444 | 6.7905478  | -4.6012070 |
| C | 8.0923413 | 3.3845265  | -5.1045966 |
| N | 5.7955092 | 6.9494798  | -7.0394699 |
| C | 3.4136818 | 6.7842205  | -3.4427237 |
| C | 3.9018538 | 9.2078018  | -4.8270333 |
| H | 4.0761911 | 10.1315878 | -5.3790286 |
| C | 8.3207406 | 2.3829146  | -4.1228651 |
| C | 4.4734575 | 8.0036036  | -5.2951411 |
| C | 3.1239325 | 9.1963678  | -3.6800088 |

|   |            |            |             |
|---|------------|------------|-------------|
| H | 2.6866079  | 10.1211266 | -3.3048212  |
| C | 2.8792062  | 7.9961070  | -2.9915562  |
| H | 2.2591662  | 8.0146179  | -2.0969717  |
| C | 7.6592247  | 1.4032526  | -2.0430919  |
| H | 8.6518551  | 1.5081388  | -1.5788884  |
| H | 6.8802949  | 1.5979941  | -1.2995989  |
| H | 7.5401943  | 0.3869274  | -2.4487033  |
| C | 5.2051277  | 7.9908634  | -6.5267624  |
| H | 5.2429982  | 8.9298643  | -7.0927637  |
| C | 9.3694636  | 1.4794388  | -4.3129221  |
| H | 9.5470807  | 0.6922754  | -3.5822940  |
| C | 2.4028396  | 5.5121783  | -1.6850183  |
| H | 1.3796222  | 5.8498377  | -1.9091554  |
| H | 2.3903766  | 4.4570894  | -1.3955056  |
| H | 2.8293601  | 6.1167440  | -0.8704142  |
| C | 8.8263131  | 4.5804819  | -7.1439349  |
| H | 9.6698578  | 4.7235865  | -7.8286636  |
| C | 8.9509220  | 3.4820944  | -6.2296444  |
| C | 6.4829494  | 7.0431607  | -8.3236254  |
| H | 6.4177877  | 8.0563016  | -8.7434552  |
| C | 7.9447211  | 6.6280275  | -8.0947542  |
| C | 10.2108286 | 1.5725033  | -5.4376259  |
| H | 11.0225355 | 0.8546856  | -5.5525126  |
| C | 10.0221909 | 2.5679873  | -6.3796876  |
| H | 10.6852837 | 2.6610047  | -7.2399366  |
| C | 8.7053649  | 7.7173277  | -7.3242859  |
| H | 9.7306696  | 7.3830677  | -7.1171779  |
| H | 8.7479207  | 8.6360730  | -7.9242257  |
| H | 8.2165094  | 7.9421737  | -6.3664917  |
| C | 8.6071602  | 6.3228572  | -9.4399147  |
| H | 8.4751319  | 7.1888280  | -10.1018147 |
| H | 9.6868728  | 6.1538676  | -9.3384011  |
| H | 8.1470529  | 5.4460549  | -9.9150434  |
| H | 6.0005068  | 6.3384860  | -9.0172342  |

**1•Li<sup>+</sup>**

|   |           |            |            |
|---|-----------|------------|------------|
| V | 7.2386868 | 4.4256786  | 6.9196290  |
| O | 5.6660047 | 4.2607048  | 7.0725048  |
| O | 7.7717364 | 5.6372733  | 8.2129412  |
| O | 8.0478412 | 2.9622790  | 7.6751297  |
| O | 7.8584891 | 6.5758704  | 10.7040017 |
| O | 9.1185063 | 1.4419027  | 9.5987878  |
| N | 7.2045738 | 6.0230420  | 5.6127680  |
| N | 7.8284222 | 3.5950147  | 5.1395496  |
| C | 7.2700803 | 6.8563672  | 8.4421220  |
| C | 7.3151963 | 7.3890208  | 9.7573993  |
| C | 6.8076565 | 8.6677551  | 9.9917150  |
| H | 6.8129078 | 9.0783939  | 10.9997588 |
| C | 6.2918392 | 9.4443174  | 8.9388040  |
| H | 5.9070740 | 10.4407009 | 9.1537325  |
| C | 6.2870716 | 8.9580548  | 7.6441367  |

|    |            |            |            |
|----|------------|------------|------------|
| H  | 5.9171037  | 9.5657157  | 6.8181004  |
| C  | 6.7684572  | 7.6534742  | 7.3797076  |
| C  | 6.8792127  | 7.2167177  | 6.0181154  |
| H  | 6.7080001  | 7.9884093  | 5.2597008  |
| C  | 7.4619724  | 5.7689644  | 4.1574998  |
| C  | 6.5277439  | 6.5511539  | 3.2329198  |
| H  | 6.7704769  | 7.6213148  | 3.2139275  |
| H  | 6.6492415  | 6.1732173  | 2.2091216  |
| H  | 5.4783461  | 6.4218529  | 3.5304979  |
| C  | 8.9362495  | 6.1007543  | 3.8825469  |
| H  | 9.6036519  | 5.5285506  | 4.5407701  |
| H  | 9.1799497  | 5.8642599  | 2.8383456  |
| H  | 9.1175433  | 7.1700947  | 4.0538742  |
| C  | 7.2014529  | 4.2619816  | 4.0015600  |
| H  | 6.1202039  | 4.0646929  | 4.0449728  |
| H  | 7.5951261  | 3.8863590  | 3.0476940  |
| C  | 8.7489851  | 2.6937037  | 4.9526167  |
| H  | 9.0193732  | 2.4476556  | 3.9184572  |
| C  | 9.4154764  | 1.9609816  | 5.9872642  |
| C  | 10.4040955 | 1.0150812  | 5.6401577  |
| H  | 10.6938996 | 0.9055997  | 4.5949369  |
| C  | 10.9837196 | 0.2334654  | 6.6275000  |
| H  | 11.7559080 | -0.4911879 | 6.3719008  |
| C  | 10.5760630 | 0.3556349  | 7.9649390  |
| H  | 11.0400319 | -0.2764057 | 8.7196954  |
| C  | 9.5833817  | 1.2685054  | 8.3358474  |
| C  | 9.0088020  | 2.1014790  | 7.3393148  |
| C  | 7.9773273  | 7.0958181  | 12.0471274 |
| H  | 8.5898316  | 8.0088154  | 12.0564804 |
| H  | 6.9849211  | 7.2977279  | 12.4764060 |
| H  | 8.4771955  | 6.3093653  | 12.6207578 |
| C  | 9.6503412  | 0.5873071  | 10.6372249 |
| H  | 9.1164301  | 0.8691073  | 11.5497468 |
| H  | 9.4575327  | -0.4700551 | 10.4059454 |
| H  | 10.7282088 | 0.7607545  | 10.7680673 |
| Li | 7.5986572  | 3.6973573  | 10.6023787 |

**1•Na<sup>+</sup>**

|   |           |           |            |
|---|-----------|-----------|------------|
| V | 7.1838995 | 4.4287500 | 6.8782877  |
| O | 5.6076165 | 4.3070480 | 7.0220866  |
| O | 7.7682701 | 5.5877310 | 8.2109198  |
| O | 7.9866000 | 2.9760615 | 7.6500329  |
| O | 7.7413306 | 6.4204290 | 10.7208424 |
| O | 9.2145036 | 1.6961442 | 9.6119300  |
| N | 7.2376552 | 6.0325101 | 5.5974273  |
| N | 7.7540419 | 3.5742098 | 5.1054030  |
| C | 7.2819533 | 6.8132460 | 8.4478250  |
| C | 7.2785025 | 7.2961717 | 9.7798323  |
| C | 6.8066739 | 8.5827896 | 10.0365681 |
| H | 6.7777724 | 8.9625920 | 11.0560808 |
| C | 6.3666255 | 9.4073171 | 8.9850372  |

|    |            |            |            |
|----|------------|------------|------------|
| H  | 6.0066233  | 10.4096268 | 9.2144761  |
| C  | 6.3982604  | 8.9609994  | 7.6755475  |
| H  | 6.0783766  | 9.6057254  | 6.8567444  |
| C  | 6.8456592  | 7.6495559  | 7.3881627  |
| C  | 6.9678547  | 7.2349644  | 6.0188846  |
| H  | 6.8482455  | 8.0274897  | 5.2721372  |
| C  | 7.4978037  | 5.7758214  | 4.1421824  |
| C  | 6.6108145  | 6.6108646  | 3.2176760  |
| H  | 6.9040984  | 7.6683438  | 3.2136937  |
| H  | 6.7257430  | 6.2390603  | 2.1909629  |
| H  | 5.5533075  | 6.5279674  | 3.5027853  |
| C  | 8.9891874  | 6.0368670  | 3.8853515  |
| H  | 9.6205777  | 5.4259288  | 4.5445038  |
| H  | 9.2316362  | 5.7978586  | 2.8414823  |
| H  | 9.2205846  | 7.0943368  | 4.0687986  |
| C  | 7.1645287  | 4.2826057  | 3.9709388  |
| H  | 6.0746088  | 4.1378726  | 4.0068450  |
| H  | 7.5448949  | 3.8980274  | 3.0153982  |
| C  | 8.6110274  | 2.6114053  | 4.9179907  |
| H  | 8.8471554  | 2.3320765  | 3.8839992  |
| C  | 9.2690460  | 1.8747436  | 5.9568498  |
| C  | 10.2124419 | 0.8770400  | 5.6289823  |
| H  | 10.4501916 | 0.6900421  | 4.5816889  |
| C  | 10.8233211 | 0.1487671  | 6.6393292  |
| H  | 11.5578958 | -0.6173164 | 6.3940213  |
| C  | 10.5131618 | 0.3892940  | 7.9884171  |
| H  | 11.0167123 | -0.1882897 | 8.7613022  |
| C  | 9.5731069  | 1.3604595  | 8.3397340  |
| C  | 8.9344562  | 2.1005600  | 7.3146599  |
| C  | 7.7581098  | 6.8724448  | 12.0973041 |
| H  | 8.4083615  | 7.7515936  | 12.2059377 |
| H  | 6.7388157  | 7.1020978  | 12.4378393 |
| H  | 8.1624303  | 6.0378775  | 12.6780949 |
| C  | 9.7478872  | 0.8891671  | 10.6920816 |
| H  | 9.2776674  | 1.2720818  | 11.6027133 |
| H  | 9.4774338  | -0.1660073 | 10.5494233 |
| H  | 10.8392224 | 1.0026819  | 10.7567330 |
| Na | 8.6443058  | 4.1549651  | 10.1531548 |

**1•K<sup>+</sup>**

|   |           |           |            |
|---|-----------|-----------|------------|
| V | 7.3371994 | 4.4815790 | 6.9634671  |
| K | 9.3901072 | 4.3428779 | 10.3743544 |
| O | 5.7713434 | 4.2826680 | 7.1305185  |
| O | 7.8425336 | 5.7223960 | 8.2433155  |
| O | 8.2240665 | 3.0557428 | 7.6976957  |
| O | 7.7321520 | 6.6285273 | 10.7606433 |
| O | 9.3271105 | 1.5401514 | 9.5957882  |
| N | 7.2727608 | 6.0603662 | 5.6354995  |
| N | 7.8379914 | 3.6068865 | 5.1647609  |
| C | 7.2668280 | 6.9129911 | 8.4656146  |
| C | 7.2167700 | 7.4308123 | 9.7850754  |

|   |            |            |            |
|---|------------|------------|------------|
| C | 6.6469028  | 8.6865123  | 10.0011686 |
| H | 6.5840041  | 9.0892627  | 11.0101828 |
| C | 6.1537303  | 9.4505544  | 8.9293837  |
| H | 5.7202443  | 10.4293725 | 9.1311786  |
| C | 6.2266935  | 8.9722715  | 7.6335888  |
| H | 5.8649053  | 9.5672561  | 6.7949042  |
| C | 6.7715082  | 7.6903419  | 7.3864437  |
| C | 6.9220859  | 7.2502230  | 6.0292131  |
| H | 6.7446006  | 8.0128466  | 5.2635054  |
| C | 7.5283750  | 5.7905916  | 4.1831745  |
| C | 6.6316892  | 6.6012831  | 3.2465986  |
| H | 6.9132533  | 7.6617733  | 3.2239832  |
| H | 6.7504141  | 6.2132359  | 2.2263626  |
| H | 5.5749141  | 6.5114044  | 3.5324349  |
| C | 9.0158787  | 6.0640114  | 3.9153868  |
| H | 9.6570366  | 5.4749762  | 4.5847690  |
| H | 9.2578435  | 5.8050488  | 2.8760412  |
| H | 9.2344677  | 7.1279149  | 4.0753273  |
| C | 7.2086316  | 4.2957728  | 4.0398887  |
| H | 6.1217587  | 4.1397823  | 4.1098176  |
| H | 7.5656910  | 3.9031561  | 3.0785748  |
| C | 8.6693084  | 2.6297514  | 4.9437427  |
| H | 8.8602931  | 2.3504978  | 3.9004177  |
| C | 9.3344037  | 1.8578523  | 5.9495549  |
| C | 10.1901809 | 0.8020573  | 5.5665380  |
| H | 10.3776395 | 0.6255215  | 4.5071717  |
| C | 10.7677029 | -0.0015165 | 6.5372702  |
| H | 11.4345391 | -0.8144507 | 6.2525094  |
| C | 10.4968804 | 0.2168366  | 7.8974842  |
| H | 10.9613525 | -0.4279755 | 8.6411221  |
| C | 9.6436339  | 1.2467543  | 8.3034403  |
| C | 9.0609763  | 2.0863153  | 7.3201790  |
| C | 7.6633255  | 7.1132567  | 12.1225496 |
| H | 8.2426096  | 8.0406210  | 12.2352783 |
| H | 6.6181045  | 7.2739225  | 12.4226491 |
| H | 8.1030017  | 6.3254279  | 12.7423036 |
| C | 9.7796778  | 0.6206628  | 10.6199093 |
| H | 9.3396769  | 0.9840129  | 11.5535832 |
| H | 9.4176572  | -0.3958859 | 10.4114583 |
| H | 10.8765445 | 0.6283481  | 10.6932768 |

**1•Mg<sup>2+</sup>**

|   |           |           |            |
|---|-----------|-----------|------------|
| V | 5.9904422 | 5.0825641 | -6.5772619 |
| O | 6.8073139 | 4.2893083 | -5.0608325 |
| O | 4.6812637 | 5.4502107 | -5.2820360 |
| O | 5.5409162 | 3.9324331 | -7.5634075 |
| O | 6.8965706 | 2.5765215 | -3.2069919 |
| O | 4.0153393 | 5.3764002 | -2.7893777 |
| N | 7.8393070 | 5.4962656 | -7.2761992 |
| C | 4.3264270 | 6.6219855 | -4.7478012 |
| C | 7.8890548 | 3.4972103 | -5.1023013 |



|    |            |           |             |
|----|------------|-----------|-------------|
| N  | 5.6867326  | 6.9148258 | -7.3058923  |
| C  | 3.8544038  | 6.5999121 | -3.4211754  |
| C  | 3.8593402  | 9.0023697 | -4.8739878  |
| H  | 3.8866742  | 9.9445693 | -5.4209460  |
| C  | 7.9779995  | 2.5458874 | -4.0735582  |
| C  | 4.4027454  | 7.8433365 | -5.4669079  |
| C  | 3.3192719  | 8.9439379 | -3.5947984  |
| H  | 2.9082252  | 9.8430285 | -3.1383839  |
| C  | 3.3312861  | 7.7500432 | -2.8482426  |
| H  | 2.9478465  | 7.7466248 | -1.8296467  |
| C  | 6.8627886  | 1.5936297 | -2.1247545  |
| H  | 7.7378208  | 1.7304503 | -1.4790743  |
| H  | 5.9458206  | 1.8043533 | -1.5679988  |
| H  | 6.8284318  | 0.5855107 | -2.5534105  |
| C  | 5.0613371  | 7.9118598 | -6.7400333  |
| H  | 5.0629625  | 8.8787028 | -7.2565523  |
| C  | 9.0776571  | 1.7023210 | -4.0116870  |
| H  | 9.1678994  | 0.9451553 | -3.2347796  |
| C  | 3.3321815  | 5.1707051 | -1.5085897  |
| H  | 2.2596056  | 5.3451307 | -1.6459135  |
| H  | 3.5195028  | 4.1268925 | -1.2426033  |
| H  | 3.7631724  | 5.8387667 | -0.7544327  |
| C  | 8.8654990  | 4.7297329 | -7.0311517  |
| H  | 9.8002915  | 4.9272622 | -7.5683185  |
| C  | 8.9069335  | 3.6570810 | -6.0667961  |
| C  | 6.4862401  | 7.0669917 | -8.5248738  |
| H  | 6.4133658  | 8.0862207 | -8.9261694  |
| C  | 7.9527992  | 6.7152565 | -8.1605937  |
| C  | 10.0955902 | 1.8403579 | -4.9771285  |
| H  | 10.9574442 | 1.1767910 | -4.9241301  |
| C  | 10.0293135 | 2.8030448 | -5.9763046  |
| H  | 10.8397778 | 2.9075706 | -6.6973789  |
| C  | 8.5835111  | 7.8351806 | -7.3252682  |
| H  | 9.5996829  | 7.5531236 | -7.0209441  |
| H  | 8.6371935  | 8.7529136 | -7.9249574  |
| H  | 7.9958726  | 8.0381897 | -6.4195582  |
| C  | 8.7445369  | 6.4284941 | -9.4344932  |
| H  | 8.6543973  | 7.2921183 | -10.1064114 |
| H  | 9.8129818  | 6.2887333 | -9.2259039  |
| H  | 8.3549458  | 5.5403786 | -9.9493016  |
| Mg | 5.4698765  | 4.1128666 | -3.5417048  |
| H  | 6.1056873  | 6.3605286 | -9.2769430  |

### 1•Ca<sup>2+</sup>

|   |           |           |            |
|---|-----------|-----------|------------|
| V | 6.0988014 | 5.1019800 | -6.3513830 |
| O | 6.9960637 | 4.2739354 | -4.9054865 |
| O | 4.8122143 | 5.5586421 | -5.0494379 |
| O | 5.5889548 | 3.9327443 | -7.2836152 |
| O | 7.1685377 | 2.3637754 | -3.1707397 |
| O | 3.7799714 | 5.6269610 | -2.6381821 |
| N | 7.8882022 | 5.4960512 | -7.1999026 |

|    |            |           |             |
|----|------------|-----------|-------------|
| C  | 4.3009077  | 6.7326854 | -4.6452545  |
| C  | 8.0169234  | 3.4135966 | -5.0840292  |
| N  | 5.7295582  | 6.8891379 | -7.1955207  |
| C  | 3.6744572  | 6.7841764 | -3.3827358  |
| C  | 3.7041622  | 9.0647397 | -5.0217518  |
| H  | 3.7267667  | 9.9523382 | -5.6536194  |
| C  | 8.1578911  | 2.3848891 | -4.1338151  |
| C  | 4.3538725  | 7.8915086 | -5.4600600  |
| C  | 3.0566858  | 9.0858825 | -3.7941833  |
| H  | 2.5633161  | 9.9944568 | -3.4526702  |
| C  | 3.0473841  | 7.9524992 | -2.9637118  |
| H  | 2.5583798  | 8.0019910 | -1.9927868  |
| C  | 7.2669594  | 1.3457209 | -2.1259535  |
| H  | 8.2047070  | 1.4749175 | -1.5728995  |
| H  | 6.4133824  | 1.5190108 | -1.4636307  |
| H  | 7.1963715  | 0.3489493 | -2.5770426  |
| C  | 5.0527509  | 7.8926298 | -6.7112212  |
| H  | 5.0197948  | 8.8170763 | -7.2990777  |
| C  | 9.2219992  | 1.4963684 | -4.2300379  |
| H  | 9.3414295  | 0.6862724 | -3.5132131  |
| C  | 3.0437760  | 5.5549199 | -1.3761185  |
| H  | 1.9770065  | 5.7200549 | -1.5657032  |
| H  | 3.2019688  | 4.5387328 | -1.0002054  |
| H  | 3.4502638  | 6.2879100 | -0.6694451  |
| C  | 8.8917749  | 4.6785405 | -7.0543483  |
| H  | 9.7873798  | 4.8458416 | -7.6631582  |
| C  | 8.9570105  | 3.5736840 | -6.1321993  |
| C  | 6.4999852  | 7.0105314 | -8.4366679  |
| H  | 6.3914538  | 8.0105068 | -8.8765744  |
| C  | 7.9751600  | 6.7086398 | -8.0872134  |
| C  | 10.1589589 | 1.6488117 | -5.2684367  |
| H  | 10.9902790 | 0.9484572 | -5.3328460  |
| C  | 10.0433544 | 2.6732850 | -6.1973169  |
| H  | 10.7856791 | 2.7921294 | -6.9860247  |
| C  | 8.5860626  | 7.8447373 | -7.2571350  |
| H  | 9.6130048  | 7.5869465 | -6.9678783  |
| H  | 8.6073219  | 8.7644704 | -7.8559019  |
| H  | 8.0066168  | 8.0315080 | -6.3428385  |
| C  | 8.7672281  | 6.4448758 | -9.3656677  |
| H  | 8.6450240  | 7.3058873 | -10.0354835 |
| H  | 9.8414748  | 6.3401549 | -9.1657830  |
| H  | 8.4026707  | 5.5458764 | -9.8803101  |
| Ca | 5.3982092  | 4.0012367 | -3.2382389  |
| H  | 6.1241727  | 6.2630743 | -9.1504525  |

**1•Ba<sup>2+</sup>**

|   |           |           |            |
|---|-----------|-----------|------------|
| V | 6.2087218 | 5.1705322 | -6.0501319 |
| O | 7.2485594 | 4.2829142 | -4.7597079 |
| O | 5.0102525 | 5.7851259 | -4.7727237 |
| O | 5.5570946 | 4.0315672 | -6.9336186 |
| O | 7.6004848 | 2.2928482 | -3.0336611 |

|    |            |            |            |
|----|------------|------------|------------|
| O  | 3.5265245  | 5.8400516  | -2.5593621 |
| N  | 7.9164424  | 5.4726348  | -7.1230542 |
| C  | 4.3156578  | 6.9034010  | -4.5102181 |
| C  | 8.1549386  | 3.3348688  | -5.0730863 |
| N  | 5.8183947  | 6.9368010  | -7.0124466 |
| C  | 3.4963923  | 6.9540523  | -3.3595759 |
| C  | 3.5929899  | 9.1610743  | -5.1036631 |
| H  | 3.6246742  | 10.0054876 | -5.7922274 |
| C  | 8.3815804  | 2.2780063  | -4.1628343 |
| C  | 4.3635266  | 8.0131928  | -5.3861977 |
| C  | 2.7978513  | 9.1990453  | -3.9683425 |
| H  | 2.2040667  | 10.0836550 | -3.7429926 |
| C  | 2.7470182  | 8.1005783  | -3.0971105 |
| H  | 2.1196982  | 8.1516805  | -2.2092757 |
| C  | 7.8012954  | 1.2235755  | -2.0677854 |
| H  | 8.8285315  | 1.2503809  | -1.6822475 |
| H  | 7.0955648  | 1.4170880  | -1.2535077 |
| H  | 7.5743675  | 0.2535804  | -2.5280792 |
| C  | 5.1188899  | 7.9548802  | -6.6007554 |
| H  | 5.0779606  | 8.8387176  | -7.2480471 |
| C  | 9.3369878  | 1.3076399  | -4.4563501 |
| H  | 9.5055421  | 0.4776488  | -3.7734554 |
| C  | 2.5539534  | 5.7597166  | -1.4780759 |
| H  | 1.5396832  | 5.8830988  | -1.8781202 |
| H  | 2.6637686  | 4.7546981  | -1.0585450 |
| H  | 2.7728157  | 6.5149559  | -0.7123843 |
| C  | 8.8445624  | 4.5609686  | -7.1343381 |
| H  | 9.6599311  | 4.6660189  | -7.8579796 |
| C  | 8.9352774  | 3.4272351  | -6.2565159 |
| C  | 6.5349110  | 7.0138428  | -8.2873824 |
| H  | 6.4287302  | 8.0062556  | -8.7448832 |
| C  | 8.0084262  | 6.6849444  | -8.0005505 |
| C  | 10.0988705 | 1.3931598  | -5.6340436 |
| H  | 10.8434539 | 0.6255317  | -5.8399465 |
| C  | 9.9193141  | 2.4459641  | -6.5154267 |
| H  | 10.5283850 | 2.5303608  | -7.4151309 |
| C  | 8.6749480  | 7.7986608  | -7.1802773 |
| H  | 9.7070913  | 7.5163425  | -6.9357374 |
| H  | 8.6902792  | 8.7266451  | -7.7667309 |
| H  | 8.1358106  | 7.9844949  | -6.2414553 |
| C  | 8.7511300  | 6.4305527  | -9.3106128 |
| H  | 8.6225834  | 7.3073843  | -9.9579979 |
| H  | 9.8296527  | 6.3013694  | -9.1521036 |
| H  | 8.3510367  | 5.5508628  | -9.8328320 |
| Ba | 5.8579499  | 4.3410975  | -2.3616137 |
| H  | 6.1097076  | 6.2585598  | -8.9647673 |

**Control files:**

V(IV):

```

1
$cosmo
  epsilon= 36.600
rsolv= 1.30
  refind= 1.3440
$cosmo_atoms
# radii in Angstrom units
v 1
\
  radius= 2.2230
o 2-6
\
  radius= 1.7200
n 7,10
\
  radius= 1.8300
c 8-9,11-12,14-16,18,20,24,26,28,32,34-35,37-38,40,42,46
\
  radius= 2.0000
h 13,17,19,21-23,25,27,29-31,33,36,39,41,43-45,47-50
\
  radius= 1.3000
$cosmo_out file=out.ccf
$title
$operating system unix
$symmetry c1
$coord file=coord
$user-defined bonds file=coord
$atoms
v 1
\
  basis =v def2-TZVP
\
jbas =v def2-TZVP
o 2-6
\
  basis =o def2-TZVP
\
  jbas =o def2-TZVP
n 7,10
\
  basis =n def2-TZVP
\
jbas =n def2-TZVP
c 8-9,11-12,14-16,18,20,24,26,28,32,34-35,37-38,40,42,46
\
basis =c def2-TZVP
\
  jbas =c def2-TZVP
h 13,17,19,21-23,25,27,29-31,33,36,39,41,43-45,47-50
\

```

```

basis =h def2-TZVP
\
jbas =h def2-TZVP
$basis file=basis
$rundimensions
dim(fock,dens)=671197
natoms=50
nshell=400
nbf(CAO)=1156
nbf(AO)=1014
dim(trafo[SAO<-->AO/CAO])=1440
rhfshells=2
$uhfmo_alpha file=alpha
$uhfmo_beta file=beta
$uhf
$alpha shells
a 1-110 ( 1 )
$beta shells
a 1-109 ( 1 )
$scfiterlimit 900
$thize 0.10000000E-04
$thime 5
$scfdump
$scfintunit
unit=30 size=0 file=twoint
$scfdiis
$maxcor 500
$drvopt
cartesian on
basis off
global off
hessian on
dipole on
nuclear polarizability
$interconversion off
qconv=1.d-7
maxiter=25
$optimize
internal off
cartesian on
global off
basis off logarithm
$coordinateupdate
dqmax=0.3
interpolate on
statistics 5
$forceupdate
ahlrichs numgeo=0 mingeo=3 maxgeo=4 modus=<g|dq> dynamic
fail=0.3
threig=0.005 reseig=0.005 thrbig=3.0 scale=1.00
damping=0.0

```

```

$forceinit on
  diag=default
$energy file=energy
$grad file=gradient
$forceapprox file=forceapprox
$lock off
$dft
  functional b-p
  gridsize m3
$scfconv 6
$scfdamp start=0.700 step=0.050 min=0.050
$scforbitalshift closedshell=.05
$ricore 0
$rij
$jbas file=auxbasis
$disp3
$marij
$last step ridft
$last SCF energy change = -.32885964E-07
$ssquare from ridft
  0.758 (not to be modified here)
$charge from ridft
  0.000 (not to be modified here)
$dipole from ridft
  x 1.87171617170861 y 2.33151846621786 z -
0.66530913608722 a.u.
  | dipole | = 7.7854145991 debye
$optinfo file=optinfo
$hessapprox file=hessapprox
$orbital_max_rnorm 0.83291368338185E-04
$subenergy Etot E1 Ej
Ex Ec En Disp
-2205.983904926 -9262.144045727 4138.742493120 -
210.8326326196 -8.408883327443 3136.722907742 -
.6374411323413E-01
$end
$TMPDIR /home/tony/TMP

```

**1•Li<sup>+</sup>** (as example of monocationic)

```

$cosmo
  epsilon= 36.600
  rsolv= 1.30
  refind= 1.3440
$cosmo_atoms
# radii in Angstrom units
v 1
\
  radius= 2.2230
o 2-6
\

```

```

    radius= 1.7200
n 7-8
\
    radius= 1.8300
c 9-11,13,15,17-18,20-21,25,29,32,34-35,37,39,41-43,47
\
    radius= 2.0000
h 12,14,16,19,22-24,26-28,30-31,33,36,38,40,44-46,48-50
\
    radius= 1.3000
li 51
\
    radius= 1.5700
$cosmo_out file=out.ccf
$title
$operating system unix
$symmetry c1
$coord file=coord
$user-defined bonds file=coord
$atoms
v 1
\
    basis =v def2-TZVP
\
jbas =v def2-TZVP
o 2-6
\
    basis =o def2-TZVP
\
    jbas =o def2-TZVP
n 7-8
\
    basis =n def2-TZVP
\
jbas =n def2-TZVP
c 9-11,13,15,17-18,20-21,25,29,32,34-35,37,39,41-43,47
\
basis =c def2-TZVP
\
    jbas =c def2-TZVP
h 12,14,16,19,22-24,26-28,30-31,33,36,38,40,44-46,48-50
\
    basis =h def2-TZVP
\
    jbas =h def2-TZVP
li 51
\
    basis =li def2-TZVP
\
    jbas =li def2-TZVP
$basis file=basis

```

```

$rundimensions
  dim(fock,dens)=687495
  natoms=51
  nshell=408
  nbf(CAO)=1170
  nbf(AO)=1028
dim(trafo[SAO<-->AO/CAO])=1454
  rhfshells=2
$uhfmo_alpha   file=alpha
$uhfmo_beta    file=beta
$uhf
$alpha shells
  a      1-111                ( 1 )
$beta shells
  a      1-110                ( 1 )
$scfiterlimit      900
$thize      0.10000000E-04
$thime      5
$scfdump
$scfintunit
  unit=30      size=0      file=twoint
$scfdiis
$maxcor      500
$drvopt
  cartesian  on
  basis      off
  global     off
  hessian    on
  dipole     on
  nuclear polarizability
$interconversion off
  qconv=1.d-7
  maxiter=25
$optimize
  internal   off
  cartesian  on
  global     off
  basis      off  logarithm
$coordinateupdate
  dqmax=0.3
  interpolate on
  statistics 5
$forceupdate
  ahlrichs numgeo=0  mingeo=3 maxgeo=4 modus=<g|dq> dynamic
fail=0.3
  threig=0.005  reseig=0.005  thrbig=3.0  scale=1.00
damping=0.0
$forceinit on
  diag=default
$energy      file=energy
$grad        file=gradient

```



```

$forceapprox      file=forceapprox
$lock off
$dft
    functional b-p
    gridsize      m3
$scfconv          6
$scfdamp          start=0.700  step=0.050  min=0.050
$scforbitalshift closedshell=.05
$ricore           0
$rjij
$jbas             file=auxbasis
$disp3
$marij
$last step        ridft
$last SCF energy change = -.88273737E-07
$ssquare from ridft
    0.758 (not to be modified here)
$charge from ridft
    1.000 (not to be modified here)
$dipole from ridft
    x      17.72687438411231      y      9.11032611295741      z
14.86591083223811      a.u.
    | dipole | = 63.1993270160      debye
$optinfo          file=optinfo
$hessapprox       file=hessapprox
$orbital_max_rnorm 0.77239137056946E-04
$subenergy        Etot          E1          Ej
Ex               Ec            En            Disp
-2213.456573680  -9478.442657178      4231.801600192      -
212.5072647536  -8.458856438270      3254.221678359      -
.7107386187977E-01
$end
$TMPDIR /home/tony/TMP

```

**1•Mg<sup>2+</sup>** (as example of dicationic)

```

$cosmo
    epsilon= 36.600
    rsolv= 1.30
    refind= 1.3440
$cosmo_atoms
# radii in Angstrom units
v 1
\
    radius= 2.2230
o 2-6
\
    radius= 1.7200
n 7,10
\
    radius= 1.8300

```

```

c 8-9,11-12,14-16,18,20,24,26,28,32,34-35,37-38,40,42,46
\
radius= 2.0000
h 13,17,19,21-23,25,27,29-31,33,36,39,41,43-45,47-49,51
\
radius= 1.3000
mg 50
\
radius= 1.6380
$cosmo_out file=out.ccf
$title
$operating system unix
$symmetry c1
$coord file=coord
$user-defined bonds file=coord
$atoms
v 1
\
basis =v def2-TZVP
\
jbas =v def2-TZVP
o 2-6
\
basis =o def2-TZVP
\
jbas =o def2-TZVP
n 7,10
\
basis =n def2-TZVP
\
jbas =n def2-TZVP
c 8-9,11-12,14-16,18,20,24,26,28,32,34-35,37-38,40,42,46
\
basis =c def2-TZVP
\
jbas =c def2-TZVP
h 13,17,19,21-23,25,27,29-31,33,36,39,41,43-45,47-49,51
\
basis =h def2-TZVP
\
jbas =h def2-TZVP
mg 50
\
basis =mg def2-TZVP
\
jbas =mg def2-TZVP
$basis file=basis
$rundimensions
dim(fock,dens)=712344
natoms=51
nshell=412

```

```

    nbf(CAO)=1191
    nbf(AO)=1046
dim(trafo[SAO<-->AO/CAO])=1481
    rhfshells=2
$uhfmo_alpha    file=alpha
$uhfmo_beta    file=beta
$uhf
$alpha shells
  a      1-115                                ( 1 )
$beta shells
  a      1-114                                ( 1 )
$scfiterlimit      900
$sthize      0.10000000E-04
$sthime      5
$scfdump
$scfintunit
  unit=30      size=0      file=twoint
$scfdiis
$maxcor      500
$drvopt
  cartesian  on
  basis      off
  global     off
  hessian    on
  dipole     on
  nuclear polarizability
$interconversion  off
  qconv=1.d-7
  maxiter=25
$optimize
  internal   off
  cartesian  on
  global     off
  basis      off    logarithm
$coordinateupdate
  dqmax=0.3
  interpolate  on
  statistics   5
$forceupdate
  ahlrichs numgeo=0  mingeo=3  maxgeo=4  modus=<g|dq>  dynamic
fail=0.3
  threig=0.005  reseig=0.005  thrbig=3.0  scale=1.00
damping=0.0
$forceinit on
  diag=default
$energy    file=energy
$grad      file=gradient
$forceapprox  file=forceapprox
$lock off
$dft
  functional b-p

```

```

    gridsize    m3
$scfconv      6
$scfdamp      start=0.700  step=0.050  min=0.050
$scforbitalshift  closedshell=.05
$ricore       0
$rrij
$jbas        file=auxbasis
$disp3
$marij
$last step    ridft
$last SCF energy change = -.10832446E-05
$ssquare from ridft
                0.759 (not to be modified here)
$charge from ridft
                2.000 (not to be modified here)
$dipole from ridft
  x    23.65136279607759    y    19.01574015961478    z    -
15.24425270857046    a.u.
  | dipole | = 86.3217670359  debye
$optinfo      file=optinfo
$hessapprox   file=hessapprox
$orbital_max_rnorm 0.12464097804783E-03
$subenergy   Etot          E1          Ej
Ex           Ec           En           Disp
-2405.897859058  -10361.55495729    4613.654407609    -
226.5682132149   -8.847413946725    3577.492354904    -
.7403711689598E-01
$end
$TMPDIR /home/tony/TMP

```

V(V):

1

\$cosmo

epsilon= 36.600

rsolv= 1.30

refind= 1.3440

\$cosmo\_atoms

# radii in Angstrom units

v 1

\

radius= 2.2230

o 2-6

\

radius= 1.7200

n 7,10

\

radius= 1.8300

c 8-9,11-12,14-16,18,20,24,26,28,32,34-35,37-38,40,42,46

\

```

radius= 2.0000
h 13,17,19,21-23,25,27,29-31,33,36,39,41,43-45,47-50
\
  radius= 1.3000
$cosmo_out file=out.ccf
$title
$operating system unix
$symmetry c1
$coord file=coord
$user-defined bonds file=coord
$atoms
v 1
\
  basis =v def2-TZVP
\
jbas =v def2-TZVP
o 2-6
\
  basis =o def2-TZVP
\
  jbas =o def2-TZVP
n 7,10
\
  basis =n def2-TZVP
\
jbas =n def2-TZVP
c 8-9,11-12,14-16,18,20,24,26,28,32,34-35,37-38,40,42,46
\
basis =c def2-TZVP
\
  jbas =c def2-TZVP
h 13,17,19,21-23,25,27,29-31,33,36,39,41,43-45,47-50
\
  basis =h def2-TZVP
\
  jbas =h def2-TZVP
$basis file=basis
$rundimensions
  dim(fock,dens)=671197
  natoms=50
  nshell=400
  nbf(CAO)=1156
  nbf(AO)=1014
dim(trafo[SAO<-->AO/CAO])=1440
rhfshells=1
$scfmo file=mos
$closed shells
  a 1-109
$scfiterlimit 900
$thize 0.10000000E-04
$thime 5

```

```
$scfdump
$scfintunit
  unit=30          size=0          file=twoint
$scfdiis
$maxcor          500
$scforbitalshift automatic=.1
$drvopt
  cartesian      on
  basis          off
  global         off
  hessian       on
  dipole        on
  nuclear polarizability
$interconversion off
  qconv=1.d-7
  maxiter=25
$optimize
  internal      off
  cartesian     on
  global        off
  basis         off    logarithm
$coordinateupdate
  dqmax=0.3
  interpolate   on
  statistics    5
$forceupdate
  ahlrichs numgeo=0  mingeo=3  maxgeo=4  modus=<g|dq> dynamic
fail=0.3
  threig=0.005  reseig=0.005  thrbig=3.0  scale=1.00
damping=0.0
$forceinit on
  diag=default
$energy          file=energy
$grad            file=gradient
$forceapprox     file=forceapprox
$lock off
$dft
  functional b-p
  gridsize    m3
$scfconv        6
$scfdamp        start=0.700  step=0.050  min=0.050
$ricore         0
$rij
$jbas           file=auxbasis
$disp3
$marij
$last step      ridft
$last SCF energy change = -.96050371E-07
$charge from ridft
  1.000 (not to be modified here)
$dipole from ridft
```

```

x      13.28170757308317      y      12.36129045918187      z      -
10.78659039443983      a.u.
| dipole | = 53.6520792389 debye
$optinfo      file=optinfo
$hessapprox      file=hessapprox
$orbital_max_rnorm 0.23259775810665E-04
$subenergy      Etot      E1      Ej
Ex      Ec      En      Disp
-2205.818689920      -9301.862057852      4143.105571060      -
210.5453558895      -8.378585786658      3171.926537956      -
.6479940720604E-01
$end
$TMPDIR /home/tony/TMP

```

**1•Li<sup>+</sup>** (as example of monocationic)

```

$cosmo
epsilon= 36.600
rsolv= 1.30
refind= 1.3440
$cosmo_atoms
# radii in Angstrom units
v 1
\
radius= 2.2230
o 2-6
\
radius= 1.7200
n 7-8
\
radius= 1.8300
c 9-11,13,15,17-18,20-21,25,29,32,34-35,37,39,41-43,47
\
radius= 2.0000
h 12,14,16,19,22-24,26-28,30-31,33,36,38,40,44-46,48-50
\
radius= 1.3000
li 51
\
radius= 1.5700
$cosmo_out file=out.ccf
$title
$operating system unix
$symmetry c1
$coord      file=coord
$user-defined bonds      file=coord
$atoms
v 1
\
basis =v def2-TZVP
\

```

```

jbas =v def2-TZVP
o 2-6
\
  basis =o def2-TZVP
\
  jbas =o def2-TZVP
n 7-8
\
  basis =n def2-TZVP
\
jbas =n def2-TZVP
c 9-11,13,15,17-18,20-21,25,29,32,34-35,37,39,41-43,47
\
basis =c def2-TZVP
\
  jbas =c def2-TZVP
h 12,14,16,19,22-24,26-28,30-31,33,36,38,40,44-46,48-50
\
  basis =h def2-TZVP
\
  jbas =h def2-TZVP
li 51
\
  basis =li def2-TZVP
\
  jbas =li def2-TZVP
$basis file=basis
$rundimensions
  dim(fock,dens)=687495
  natoms=51
  nshell=408
  nbf(CAO)=1170
  nbf(AO)=1028
dim(trafo[SAO<-->AO/CAO])=1454
rhfshells=1
$scfmo file=mos
$closed shells
  a 1-110
$scfiterlimit 900
$thize 0.10000000E-04
$thime 5
$scfdump
$scfintunit
  unit=30 size=0 file=twoint
$scfdiis
$maxcor 500
$scforbitalshift automatic=.1
$drvopt
  cartesian on
  basis off
  global off

```

( 2 )



```

    hessian      on
    dipole       on
    nuclear polarizability
$interconversion off
    qconv=1.d-7
    maxiter=25
$optimize
    internal    off
    cartesian   on
    global      off
    basis       off    logarithm
$coordinateupdate
    dqmax=0.3
    interpolate on
    statistics  5
$forceupdate
    ahlrichs numgeo=0  mingeo=3  maxgeo=4  modus=<g|dq> dynamic
fail=0.3
    threig=0.005  reseig=0.005  thrbig=3.0  scale=1.00
damping=0.0
$forceinit on
    diag=default
$energy      file=energy
$grad        file=gradient
$forceapprox file=forceapprox
$lock off
$dft
    functional b-p
    gridsize   m3
$scfconv     6
$scfdamp     start=0.700  step=0.050  min=0.050
$ricore      0
$rij
$jbas        file=auxbasis
$disp3
$marij
$last step   ridft
$last SCF energy change = -.12509190E-07
$charge from ridft
    2.000 (not to be modified here)
$dipole from ridft
    x    31.01894848339543    y    16.30484486798923    z
31.02627920662462    a.u.
    | dipole | = 118.9658521651    debye
$optinfo     file=optinfo
$hessapprox  file=hessapprox
$orbital_max_rnorm 0.39225834080954E-04
$subenergy   Etot          E1          Ej          Disp
Ex           Ec           En

```

```
-2213.268334993      -9431.612376765      4194.342995294      -
212.1803442829      -8.423563515285      3244.692904477      -
.8795020041439E-01
$end
$TMPDIR /home/tony/TMP
```

**1•Mg<sup>2+</sup>** (as example of dicationic)

```
$cosmo
  epsilon= 36.600
  rsolv= 1.30
  refind= 1.3440
$cosmo_atoms
# radii in Angstrom units
v 1
\
  radius= 2.2230
o 2-6
\
  radius= 1.7200
n 7,10
\
  radius= 1.8300
c 8-9,11-12,14-16,18,20,24,26,28,32,34-35,37-38,40,42,46
\
radius= 2.0000
h 13,17,19,21-23,25,27,29-31,33,36,39,41,43-45,47-49,51
\
  radius= 1.3000
mg 50
\
  radius= 1.6380
$cosmo_out file=out.ccf
$title
$operating system unix
$symmetry c1
$coord file=coord
$user-defined bonds file=coord
$atoms
v 1
\
  basis =v def2-TZVP
\
jbas =v def2-TZVP
o 2-6
\
  basis =o def2-TZVP
\
  jbas =o def2-TZVP
n 7,10
\
```

```

    basis =n def2-TZVP
\
jbas  =n def2-TZVP
c  8-9,11-12,14-16,18,20,24,26,28,32,34-35,37-38,40,42,46
\
basis =c def2-TZVP
\
    jbas  =c def2-TZVP
h  13,17,19,21-23,25,27,29-31,33,36,39,41,43-45,47-49,51
\
    basis =h def2-TZVP
\
    jbas  =h def2-TZVP
mg 50
\
    basis =mg def2-TZVP
\
    jbas  =mg def2-TZVP
$basis    file=basis
$rundimensions
    dim(fock,dens)=712344
    natoms=51
    nshell=412
    nbf(CAO)=1191
    nbf(AO)=1046
dim(trafo[SAO<-->AO/CAO])=1481
rhfshells=1
$scfmo    file=mos
$closed shells
    a        1-114
$scfiterlimit    900
$thize    0.10000000E-04
$thime    5
$scfdump
$scfintunit
    unit=30        size=0        file=twoint
$scfdiis
$maxcor    500
$scforbitalshift    automatic=.1
$drvopt
    cartesian    on
    basis        off
    global       off
    hessian      on
    dipole       on
    nuclear polarizability
$interconversion    off
    qconv=1.d-7
    maxiter=25
$optimize
    internal    off

```

( 2 )

```

    cartesian  on
    global     off
    basis      off    logarithm
$coordinateupdate
    dqmax=0.3
    interpolate on
    statistics 5
$forceupdate
    ahlrachs numgeo=0  mingeo=3  maxgeo=4  modus=<g|dq>  dynamic
fail=0.3
    threig=0.005  reseig=0.005  thrbig=3.0  scale=1.00
damping=0.0
$forceinit on
    diag=default
$energy      file=energy
$grad        file=gradient
$forceapprox file=forceapprox
$lock off
$dft
    functional b-p
    gridsize   m3
$scfconv     6
$scfdamp     start=0.700  step=0.050  min=0.050
$ricore      0
$rij
$jbas        file=auxbasis
$disp3
$marij
$last step   ridft
$last SCF energy change = -.33855940E-07
$charge from ridft
    3.000 (not to be modified here)
$dipole from ridft
    x    35.05183388506157    y    29.37000920167475    z    -
25.53353405932103    a.u.
    | dipole | = 133.1261721939    debye
$optinfo     file=optinfo
$hessapprox  file=hessapprox
$orbital_max_rnorm 0.41495683479115E-04
$subenergy   Etot          E1          Ej
Ex           Ec           En           Disp
-2405.678975099    -10365.79119650    4599.867180985    -
226.2519958355    -8.813062630628    3595.385012229    -
.7491334974965E-01
$end
$TMPDIR /home/tony/TMP

```
